# Supplementary material for: Effect of Clinical Decision Support on Cardiovascular Risk Among Adults With Bipolar Disorder, Schizoaffective Disorder, or Schizophrenia: A Cluster Randomized Clinical Trial
Source: PubMed Central journal article supplement (PMC8902652; doi:10.1001/jamanetworkopen.2022.0202), 2022-03-07
Supplement: jamanetwopen-e220202-s001.pdf [file jamanetwopen-e220202-s001.pdf]

1 **Reducing Cardiovascular Risk in Adults with Serious Mental Illness**

2 **NCT # 02451670**

3 **10.23.2014**

4

5 **Project Narrative**

6 People with serious mental illness (SMI; schizophrenia, schizoaffective disorder, or bipolar disorder) die an  
7 average of 25 years earlier than their peers, and cardiovascular (CV) disease is the leading cause of death.  
8 Primary care providers are not adequately aware of the significantly increased CV risk in patients with SMI,  
9 and, even when CV risk factors are identified, often do not take appropriate clinical actions. This project will  
10 test the ability of an electronic medical record-based clinical decision support system to help primary care  
11 providers identify, provide more appropriate care for, and control CV risk factors for patients with SMI.

## 12 **Project Summary**

13 People with serious mental illness (SMI) (schizophrenia, schizoaffective disorder, bipolar disorder) die 25 years  
14 earlier than their peers, and cardiovascular (CV) disease is the leading cause of death. Primary care providers  
15 (PCPs) often are not aware of the significantly increased CV risk in patients with SMI and, even when CV risk  
16 factors are identified, appropriate clinical actions often are not provided. Electronic medical record (EMR)-  
17 based clinical decision support (CDS) delivered at a clinical encounter may be a powerful tool to help primary  
18 care providers (PCPs) identify and control CV risk factors in patients with SMI.

19 This proposal will adapt a point-of-care EMR-based CDS system (CV Wizard) to help PCPs identify, provide  
20 appropriate care for, and control CV risk factors for patients with SMI. CV Wizard is designed to educate PCPs  
21 about the increased risk of CV disease and mortality in people with SMI, identify elevated CV risk factors in  
22 patients with SMI, prioritize these CV risks based on how much improvement in CV risk a patient would  
23 experience if the CV risk factor was adequately addressed, recommend specific medications and other  
24 interventions to decrease each elevated CV risk factor, and provide this information in an easy-to-understand  
25 format for both patients with SMI and their PCPs. For those patients who are on the SMI medications most  
26 associated with weight gain, they will be able to work with a psychiatric care manager who, under the  
27 supervision of the patient's treating psychiatrist and with the consent of the patient, will switch the SMI  
28 medication to one less associated with weight gain. The effectiveness of this intervention will be assessed in a  
29 clinic-randomized trial with 52 primary care clinics, 150 PCPs, and about 2,250 adults with SMI. We  
30 hypothesize that, relative to patients with SMI receiving care in control clinics, those in the CV Wizard clinics  
31 will have (a) reduced total modifiable CV risk; (b) better control of six individual modifiable CV risk factors,  
32 including blood pressure, lipids, tobacco use, aspirin use, overweight/obesity, and, for those with diabetes,  
33 glucose control, and (c) lower rates of prescriptions of SMI medications that are most associated with weight  
34 gain. In secondary analyses, we will also explore the impact of CV Wizard and care management on CV risk  
35 factor identification, treatment initiation and intensification; medication adherence; outpatient and inpatient  
36 utilization; risky prescribing events; and CV events.

37 This study targets an important area of research that is a priority for the National Institute of Mental Health, our  
38 health system partners, and our external stakeholder advisory board; leverages previous infrastructure  
39 investments in the Mental Health Research Network; and capitalizes on the expertise of our researchers.  
40 Developing an effective EMR-driven point-of-care CDS strategy that identifies and prioritizes available  
41 treatment options to better address uncontrolled CV risk factors in adults with SMI is a critical next step to  
42 improving the health and reducing the CV risk of this medically underserved population.

## **A Randomized Clinical Trial to Reduce Cardiovascular Risk in Adults with SMI**

### **Specific Aims**

People with serious mental illness (SMI) (schizophrenia, schizoaffective disorder, bipolar disorder) die, on average, 25 years earlier than their peers. Cardiovascular (CV) disease is the predominant cause.<sup>1</sup> Primary care providers (PCPs) are not adequately aware of the significantly increased CV risk in patients with SMI and, even when they do identify elevated CV risk factors, often do not take appropriate clinical actions.<sup>2-4</sup> Electronic medical record (EMR)-based clinical decision support (CDS) can identify at-risk patients with SMI and systematically prompt more effective treatment of their CV risk factors, but its potential has been largely untapped. The objectives of this project are to improve CV risk factor care in patients with SMI through a pragmatic trial of a point-of-care EMR-based CDS (referred to as “CV Wizard”) and a nurse care manager. The trial will be conducted in over 50 “real world” primary care clinics in three large healthcare systems.

In Phase 1 of the project, we will: (a) extend our EMR CDS algorithms, which were successfully used in a population of adults with diabetes,<sup>5</sup> including a small subset of those with modifiable CV risk and SMI, to (i) identify people with SMI and (ii) identify elevated CV risk and available treatment options; (b) develop algorithms prioritizing these options for a specific patient at each clinic visit (including possible referral to a psychiatric nurse care manager to assist with changing the antipsychotic regimen); (c) develop an effective interface to communicate this information to patients and PCPs, including specific “what drug, what dose” recommendations; (d) train nurse care managers to act liaisons between primary care and behavioral health, and assist patients in switching their obesogenic SMI medications to those with less risk, when appropriate; (e) tailor the CV Wizard to interface correctly with the EMR at each study site; and (f) develop office systems that orchestrate nurse and PCP actions to reinforce consistent ongoing use of this novel intervention.

In Phase 2, primary care clinics will be randomly assigned to receive or not receive the intervention with staggered fashion, allowing each site to learn lessons from the site(s) implementing before it and increasing efficiency. This randomized trial will test the hypothesis that compared with usual care, the intervention will significantly reduce CV risk and improve care and control of specific CV risk components (blood pressure, lipid levels, glycosylated hemoglobin, smoking, obesity, aspirin use) in adults with SMI.

Phase 3 of the project includes (a) analysis of clinical effectiveness, (b) secondary analyses to identify mediators and modifiers of the impact of the intervention, and (c) dissemination and spread of the most successful aspects of the intervention model. To achieve these objectives, we propose these specific aims:

**Primary Aim.** To assess the impact of CV Wizard and psychiatric nurse care management on CV risk factor control and appropriate SMI medication use in adults with SMI.

**Hypothesis 1.** Adults with SMI receiving care in intervention clinics will have lower total modifiable CV risk 12 months post-index than those receiving care in control clinics.

**Hypothesis 2.** Adults with SMI receiving care in intervention clinics will have better control of specific modifiable CV risk factors 12 months post-index than those receiving care in control clinics.

**Hypothesis 3.** Adults with SMI receiving care in intervention clinics will have lower rates of prescriptions for obesogenic SMI medications 12 months post-index than those receiving care in control clinics.

**Secondary Aim.** To explore the impact of CV Wizard and psychiatric nurse care management on CV risk factor identification, treatment initiation and intensification; medication adherence; outpatient and inpatient utilization; risky prescribing events; and CV events.

This project targets an important clinical domain that is a priority of NIMH, our health system partners, and our external stakeholder advisory board, leverages previous MHRN infrastructure investments, and capitalizes on the expertise of MHRN researchers. It also builds on a decade of our team’s NIH-funded work in CV disease, diabetes, mental illness, and CDS development and implementation. Developing an effective EMR-driven point-of-care CDS strategy that identifies and prioritizes available treatment options to better address uncontrolled CV risk factors in adults with SMI is a critical next step to improving the health and reducing the CV risk of this medically underserved population. In addition to data from the EMR and claims, we will interview adults with SMI about other potential contributors to CV risk and their experiences with the intervention. Therefore, regardless of the specific results of the project, we will collect crucial information to improve the CV health and inform future interventions in this area of immense importance to the health of adults with SMI.

94 **Research Strategy**95 **SIGNIFICANCE**

96 People with serious mental illness (SMI) die, on average, 25 years younger than age- and gender-matched  
 97 patients without SMI.<sup>1</sup> Medical illness accounts for 60% of premature death in SMI, while suicide and injury  
 98 account for 30% to 40%.<sup>1</sup> Cardiovascular (CV) disease is the leading cause of death in adults with SMI.<sup>1</sup>  
 99 People with schizophrenia die of CV disease at 2.3 times the rate in the general population, and more than  
 100 two-thirds of people with schizophrenia die of coronary heart disease.<sup>6, 7</sup> The relative risk for individual CV risk  
 101 factors in patients with SMI compared with the general population is 1.5-2 for obesity, 2-3 for smoking, 2 for  
 102 diabetes, and up to 5 for dyslipidemia.<sup>8, 9</sup> Druss et al found that the presence of a mental disorder was  
 103 associated with a 19% increase in 1-year risk of mortality (HR 1.19; 95% CI, 1.04-1.36), and that this excess  
 104 mortality was accounted for in large part by deficits in quality of preventive medical care.<sup>10</sup> In a study of  
 105 patients enrolled in Minnesota health care programs from 2003 to 2007, women with SMI died at a median age  
 106 of 63 years, compared with 85 years for controls; men with SMI died at a median age of 53 years, compared  
 107 with 74 years for controls.<sup>11</sup> Examining the 387 people in this cohort who died of CV disease, patients with SMI  
 108 died at a median age of 56 years, compared with 83 years in controls—an average of 27 years of life lost.<sup>11</sup>

109 Complex combinations of behavioral, pathophysiologic, care-delivery system, provider, and medication-related  
 110 factors are likely involved in the association between SMI and CV disease. *Behavioral factors* include  
 111 significantly increased rates of obesity, metabolic syndrome, sedentary lifestyle, poor diet, smoking, treatment  
 112 nonadherence, and decreased likelihood of seeking or obtaining preventive or medical care in those with SMI.<sup>1,</sup>  
 113 <sup>4, 12-20</sup> *Pathophysiological factors* include increased platelet reactivity, endothelial dysfunction, autonomic  
 114 dysfunction, hypercortisolemia, abnormal immune system activation, and increased QT-interval variability in  
 115 adults with SMI, and elevated systolic blood pressure (SBP) in patients with bipolar disorder who are manic, all  
 116 of which may promote heart disease via pro-atherogenic, pro-ischemic, or pro-arrhythmic processes.<sup>21-24</sup> *Care*  
 117 *delivery system and provider factors* include provider discomfort in treating patients with mental illness, poor  
 118 coordination and continuity of care among providers, and a decreased tendency to recognize and adequately  
 119 treat risk factors for CV disease in patients with SMI. Although the American Diabetes Association published a  
 120 consensus guideline for monitoring patients on antipsychotic medications, it is seldom followed.<sup>1, 25</sup> Patients  
 121 with mental illness continue to receive substandard care, including lower rates of CV procedures once medical  
 122 care is sought.<sup>26-28</sup> *Medication-related factors* are complex, and the effects of SMI medication on CV disease  
 123 are not well understood. Lithium and valproic acid, the most widely used mood stabilizers, are associated with  
 124 weight gain. In addition, valproic acid has been associated with insulin resistance and hyperlipidemia,<sup>22, 29</sup> while  
 125 lithium may affect cardiac conduction and renal function.<sup>30</sup> Second-generation antipsychotic medications are  
 126 widely used, and many cause weight gain, insulin resistance, diabetes, dyslipidemia, and metabolic  
 127 syndrome.<sup>1</sup> Antipsychotics have also been associated with QT-interval prolongation, orthostatic hypotension  
 128 and, rarely, torsade de pointes.<sup>31</sup> Despite these cardiac effects, non-suicide and CV mortality rates appear to  
 129 be lower in patients with SMI who take these medications long-term.<sup>32, 33</sup> This may be in part related to SMI  
 130 medications' normalization of autonomic tone, which could decrease the risk of myocardial infarction.<sup>34, 35</sup>

131 In summary, those with SMI bear a huge excess risk of CV events and mortality that is multifactorial in origin.  
 132 The problem deserves attention, and EMR-based CDS is a promising strategy to remedy several of the  
 133 causes. Given the combination of behavioral and biomedical mechanisms linking SMI and CV risk, targets for  
 134 interventions to reduce CV risk include both changing health behaviors (diet, physical activity, smoking) and  
 135 improving medical control of modifiable risk factors (hyperglycemia, hyperlipidemia, hypertension, aspirin use).  
 136 Recent research demonstrates that intensive behavioral interventions proven effective in the general  
 137 population<sup>36, 37</sup> are also effective in people living with SMI.<sup>38</sup> The trial proposed here addresses a parallel  
 138 question: Can a clinical decision support intervention proven effective in people with diabetes help to control  
 139 cardiovascular risk factors in people living with SMI?

140 **INNOVATION**

141 **Innovation in Adult SMI Care.** Patients with SMI have exceedingly high CV event rates, which contribute to a  
 142 shortened life expectancy. However, health care systems have only recently become aware of this and are  
 143 now prioritizing doing something about it. However, they aren't sure what to do. The proposed EMR-based  
 144 CDS (CV Wizard) represents a novel and innovative way to allow care systems to systematically address

145 uncontrolled CV risk factors in patients with SMI, who have multiple barriers to the receipt of standard  
146 recommended care for their medical illnesses. CV Wizard has potential to reduce disparities in care by  
147 increasing PCP awareness of this issue, providing timely identification and prioritized evidence-based  
148 treatment recommendations to control CV risk factors, and facilitate actively engaging patients in their care.

**Innovations in Decreasing Use of Antipsychotics with Increased Cardiometabolic Risks.** SMI  
149 medications contribute unequally to cardiometabolic risk. Certain SMI medications (most notably valproic acid,  
150 olanzapine, clozapine, thioridazine and chlorpromazine) can cause significant weight gain, often with  
151 associated changes in insulin resistance and lipid metabolism.<sup>13, 39</sup> Significant weight gain has also been  
152 reported, albeit to a smaller degree, with lithium, quetiapine and risperidone, while molindone, ziprasidone,  
153 aripiprazole, fluphenazine, haloperidol, pimozide, and loxapine appear to cause the least amount of weight  
154 gain in adults with SMI.<sup>40-42</sup> In the CAFÉ trial, patients who received olanzapine gained an average of 11.0 kg  
155 in 4 months, while those who received risperidone gained 6.4 kg, and those with quetiapine gained 5.5 kg.<sup>43</sup>  
156 Similarly, in the CATIE trial, 30% of patients randomized to olanzapine gained  $\geq 7\%$  of their body weight over  
157 18 months or time of discontinuation, compared to 16% for quetiapine, 14% for risperidone, and 7% for  
158 ziprasidone.<sup>35</sup> Given these differences between SMI medications, our innovative intervention 1) uses existing  
159 EMR data to identify patients with SMI taking obesogenic SMI medications who have (a) increased their body  
160 weight  $\geq 7\%$  in the previous 12 months (similar to what was used in an HMORN pilot project,<sup>44</sup> allowing us to  
161 use these developed tools), or (b) who have a BMI  $\geq 35$  kg/m<sup>2</sup>; and 2) refers such patients to a psychiatric  
162 nurse care manager who will act as a liaison between the patient's primary care and behavioral health  
163 providers, implementing protocol-based medication transitions.

**Innovative Model for Protocolized Pharmacotherapy.** Traditional research models for delivering  
165 protocolized pharmacotherapy rely on specialized clinicians working in research clinics. The high cost and  
166 limited reach of this approach make it impractical for large-scale pragmatic trials, and such a model is certainly  
167 not viable for widespread dissemination or implementation. The proposed trial will implement and evaluate an  
168 alternative model for delivery of protocolized pharmacotherapy supported by a psychiatric nurse care manager  
169 and by workflow changes in the primary care clinic to support treatment recommendations.

**Technical Innovations.** The potential for EMR technology to improve clinical care and accelerate translation  
172 of evidence into practice has been widely recognized, but few studies of EMR-based CDS have shown positive  
173 results with respect to mental health care. Most previous EMR-based CDS interventions have failed for two  
174 principal reasons: (a) PCPs have not accessed the CDS information in a timely fashion, and (b) the CDS has  
175 been limited to simple prompts or reminders.<sup>45, 46</sup> This project addresses these limitations by applying these  
176 innovative approaches: 1) The CDS goes beyond simple computer prompts and reminders to provide more  
177 sophisticated, patient-specific CDS, considering previous CV risk factor values, diagnoses, and medications  
178 and making guideline-standardized yet personalized recommendations for a range of clinical actions at the  
179 point of care; 2) The CDS is provided to both the patient and primary care physician (PCP) early in the  
180 encounter and supported by changes in clinic workflows and team responsibilities previously shown to  
181 increase the likelihood that PCPs will use the CDS in a timely and sustained fashion;<sup>47</sup> 3) The CDS algorithms  
182 are implemented in a Web service linked to the EMR, simplifying clinical updates over time and increasing  
183 scalability of the intervention to other medical groups with other types of EMRs and additional mental health  
184 conditions in the future; 4) The CDS includes intuitive provider and patient interfaces developed to clearly  
185 identify high-benefit clinical or lifestyle actions that can substantively reduce CV risk and efficiently elicit patient  
186 treatment preferences. 5) The intervention is also novel in systematically recognizing patients with SMI and  
187 efficiently triggering the CDS tool.

**Innovations Related to Future Research and Implementation.** Finally, the prioritization and treatment  
188 algorithms and Web site developed in this project can support many other applications (e.g., mapping quality of  
189 care for people with SMI at the provider or clinic level, supporting "patient-direct" applications to inform patient  
190 selection of treatment options, or reaching patients through the Internet). This project builds on our team's  
191 previous successful efforts to use CDS to support goal-based guidelines<sup>47</sup> and extends that technology—  
192 already proven to improve blood pressure (BP) and glucose control in people with diabetes—to a new target  
193 population: people with SMI.

## 195 **APPROACH**

## Preliminary Studies

**Previous Experience:** Our multidisciplinary research team has extensive experience and expertise in chronic disease, cardiology, primary care, mental health, CDS system design and implementation, and best-practices dissemination and implementation. The PI, Dr. Rossom, is an experienced psychiatrist who has led studies of the mortality associated with antipsychotics in elderly patients with dementia is an investigator on National Institutes of Health-sponsored studies of selective serotonin reuptake inhibitor use and suicide behaviors, a statewide initiative to implement best-practice models for depression care, a pragmatic trial to prevent suicide, the association between suicidal ideation and behavior, predictors of high-value treatments for mood disorders, and the association between chronic kidney disease and cognitive impairment (3U19CA079689, 1U19MH092201, 1UH2AT007755, 3U19M092201, 5R01MH080692, R01AG037551). She is also an investigator for a CMS-funded program involving care management of depression, diabetes, heart disease, and substance abuse across seven states (1C1CMS331048). Drs. O'Connor and Crain are conducting several federally funded randomized clinical trials of CDS tools for adults with major CV risk factors (HL102144, DK068314). Dr. Waring has research experience in primary care of mental illness, dementia, and rural healthcare, and is currently involved in a pilot study to develop a CDS system to improve primary care of dementia.<sup>48-52</sup> Dr. Owen-Smith has researched medical care for minority and other underserved populations and depression in medically ill patients.<sup>53-56</sup> Consultant Dr. Russell Luepker is a cardiologist with experience in evaluation and treatment of CV risk factors and disease and is chair of the Framingham Heart Study and Honolulu Heart Study Advisory Boards.<sup>57-59</sup> Consultant Dr. Ben Druss is a psychiatrist with experience in the evaluation and treatment of patients with SMI and a nationally recognized expert in the medical care of patients with mental illness.<sup>10, 18, 60-66</sup> Our team's previous and ongoing work in both mental health and cardiometabolic conditions (we have collectively written more than 500 articles and dozens of clinical guidelines) makes us uniquely well qualified to successfully conduct the proposed project.

**Pilot Data:** To assess the likelihood that the proposed intervention would be effective for adults with SMI, we examined the effect of an earlier CDS tool used with adults with diabetes at HealthPartners.<sup>47</sup> To provide pilot data for this proposal, we identified the subset of patients with diabetes and bipolar disorder (N=41) or schizophrenia (N=43). Due to the diabetes requirement, these patients had a mean age of 59 years, and 61% were female. In patients with bipolar disorder randomly assigned to the intervention group, A1c values declined by an absolute 0.8%, SBP by 9.4 mm Hg, diastolic BP (DBP) by 7.3 mm Hg, and low-density lipoprotein (LDL) cholesterol by 6.2 mg/dL at 18-months. Likewise, in patients with schizophrenia randomly assigned to the intervention group, A1c values declined by 0.7%, SBP by 11.8 mm Hg, DBP by 8.8 mm Hg, and LDL by 20.1 mg/dL. Patients with SMI in the control group started from different baseline values and had much smaller improvements in these CV risk factors (for control patients with bipolar disorder, A1c values increased by 0.2%, while SBP decreased by 3.3 mm Hg, DBP by 1.9 mm Hg, and LDL by 9.1 mg/dl at 18-month follow up; for control patients with schizophrenia, A1c values were unchanged, while SBP decreased by 3.9 mm Hg, DBP by 3.5 mm Hg, and LDL by 10.3 mg/dL over the same period). The notable improvement in CV risk measures in this small group of SMI patients with diabetes suggests that PCPs were able to use such CDS tools in the care of adults with SMI, that the patients with SMI were able to respond to this intervention in the desired way, and that this type of intervention may be strong enough to effect clinically significant improvements in the identification and control of key CV risk factors in adults with SMI.

**Preliminary Assessment of Study Population:** Preliminary data (Table 1) were collected at HealthPartners over 2 years to assess the feasibility of a significant reduction in CV risk among patients with SMI in the proposed trial. Although many SMI patients likely have BP<130/80 and LDL<130 mg/dL, about two-thirds have uncontrolled CV risk factors (especially smoking, hyperglycemia, and overweight/obesity) at any point.

**Table 1. Description of Adults Age 18 and Older with SMI at HealthPartners Medical Group, 2009-2010.**

| Condition        | N     | Mean Age | Mean Weight (lbs) | Smoker (%) | Hyperglycemia (%) <sup>2</sup> | Dyslipidemia (mg/dL) <sup>3</sup> | Elevated BP (%) <sup>4</sup> |
|------------------|-------|----------|-------------------|------------|--------------------------------|-----------------------------------|------------------------------|
| Bipolar disorder | 1,871 | 43.3     | 196               | 39.5       | 15.4                           | 2.9                               | 7.7                          |
| Schizophrenia    | 469   | 50.4     | 193               | 45.6       | 25.4                           | 3.2                               | 10.5                         |
| Schizoaffective  | 570   | 48.2     | 206               | 40.3       | 27.4                           | 3.7                               | 8.4                          |
| Total            | 2,825 | 45.3     | 198               | 40.5       | 19.3                           | 3.1                               | 8.2                          |

<sup>1</sup>Patients with missing data are not included in denominator. <sup>2</sup>Defined as A1c  $\geq$  6% or fasting glucose  $\geq$  100 mg/dL on most recent observation. <sup>3</sup>Defined as LDL  $\geq$  130 mg/dL. <sup>4</sup>Defined as SBP  $\geq$  140 mmHg.

## METHODS

**Study Overview:** In this cluster-randomized clinical trial, at least 52 primary care clinics at 3 Mental Health Research Network (MHRN) organizations will be blocked within organization on size and characteristics of patients with SMI and then randomly assigned 1:1 to CV Wizard or control clinics (Figure 1). All consenting PCPs will be allocated to the same study arm as their clinic, and the estimated 15 eligible adults with SMI under the care of each PCP will be allocated to the same study arm as their PCP.

**Study Sites:** This study will be conducted at the primary care clinics of 3 organizations: **HealthPartners Medical Group (HPMG)** is a large multispecialty group that provides care to 300,000 adults at 24 clinics throughout the Twin Cities, including 2,825 adults diagnosed with SMI. Leaders at HPMG have committed 18 primary care clinics to the project.

**Kaiser Permanente of Georgia (KPGA)** provides care to 244,000 adults at 27 clinics, including about 3,400 with SMI. KPGA clinical leaders have committed 18 clinics with about 3100 patients with SMI to this project.

**Essentia Health (EH)** is a multispecialty integrated healthcare provider with clinics across Wisconsin, Minnesota, North Dakota, and Idaho. EH serves a primarily rural population of over 900,000, including 5,200 adults with SMI. Clinic leaders at Essentia have committed 16 clinics to this project. Like HPMG and KPGA, EH uses EpicCare EMR.

**Study Participants: PCPs and Patients:** To participate, **PCPs** must practice at a randomized primary care clinic and: (a) be a general internist, family physician, or adult-care non-obstetric nurse practitioner, (b) provide ongoing primary care for six or more adults with SMI in 2012, and (c) provide written informed consent to participate in the study. About 385 eligible PCPs practice at the clinics. We anticipate, based on experience, that we will successfully recruit 150 PCPs (75 per arm). This feasible recruitment target ensures that subgroup analyses (eg, based on gender, age) will be adequately powered and that the intervention strategy is suitable for use by a large, representative segment of PCPs.

To be included in the primary aim analysis, **patients** must meet the study criteria for diagnosed SMI (one inpatient or two outpatient ICD-9 codes for schizophrenia, schizoaffective disorder or bipolar disorder and: (a) be >17 years and <80 years, (b) have a Charlson comorbidity score of 3 or less, (c) be linked to a consented PCP, and (d) have at least one primary care visit with a consented PCP in the 12 months prior to clinic randomization. Based on preliminary HPMG data (Table 1), we estimate that 75% of adult patients with SMI visit a PCP at a participating clinic each year. We estimate that 95% of adults with SMI have Charlson scores  $\leq 3$ , and 95% are  $\leq 80$ . We anticipate up to 10% to 20% per year disenrollment and a 1% to 2% per year death rate of adults with SMI. Few patients with SMI at our study sites switch clinics, and our algorithms accurately match over 95% of patients to a regular PCP. Ultimately, after accounting for all exclusions, we anticipate about  $N \approx 2,100/140 \approx 15$  adults with SMI per eligible PCP will be study-eligible at HPMG. In the 52 randomized clinics, we anticipate including data from about  $N \approx 150$  PCPs \* 15 adults per PCP  $\approx 2,250$  patients with SMI in the primary analysis. We will request a waiver of informed consent for patients from the IRB because the care recommendations in the CV Wizard intervention are limited to evidence-based care from current national and regional clinical guidelines. In the past, the IRB has waived consent in similar circumstances. Moreover, the CDS algorithms identify potentially risky treatment strategies (eg, use of a diuretic with lithium; full list to be developed in Phase 1), further reducing risks to patients with SMI. We describe in detail below how the proposed research satisfies criteria in 45 CFR 46 for waiver of informed consent.

**Design, Implementation, and Use of CV Wizard Intervention.** CV Wizard is rooted in a series of antecedent

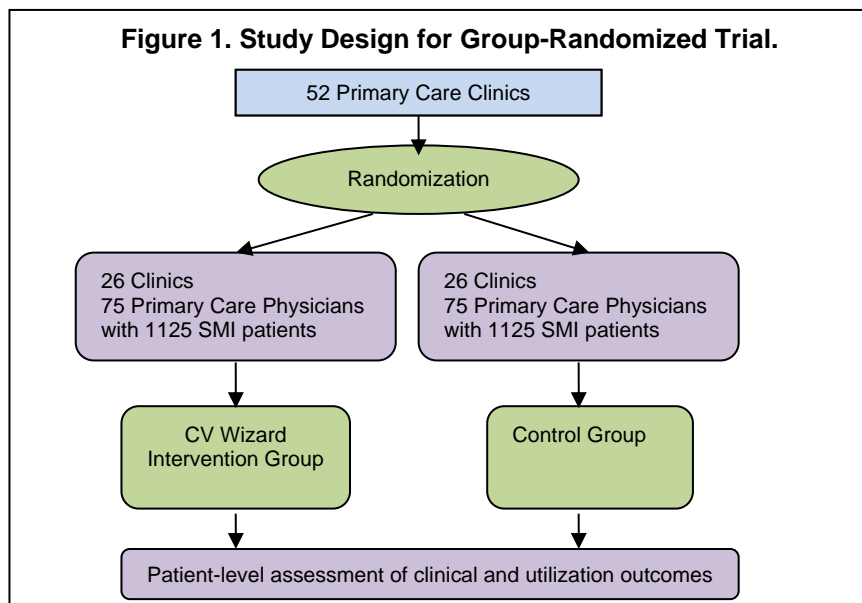



studies that have developed more limited but successful forms of CDS.<sup>5, 67</sup> In our first phase, we will develop detailed algorithms that will operate in both the EMR and Web site to provide the necessary CDS (Figure 2).

**Step 1: Identify Eligible SMI Patients and their CV Risk Factors and Prioritize Management of Any that are Uncontrolled:**

Web-based CDS algorithms estimate the patient's 10-year CV risk and quantify decreases in CV risk with appropriate management of out-of-control CV risk factors. CV risk is calculated based on the Framingham 10-year CV Disease Risk Equation.<sup>68, 69</sup> When measurements are not obtained within guideline-recommended timeframes,<sup>25</sup> CV Wizard prompts PCPs to obtain them. CV risk will be conceptualized as a vector with two components: (a) an irreversible CV risk vector related to age and gender (and their interaction), and (b) a modifiable CV risk vector related to uncontrolled CV risk factors

(potentially reversible if these risk factors were controlled). Component (b), modifiable CV risk, is composed of a vector for each uncontrolled CV risk factor of interest: BP, lipids, smoking, BMI, aspirin use, and glucose. The magnitude of the vectors determines its priority, with priority 1 (Figure 3) assigned to the risk factor with the greatest potential reduction in CV risk, and so forth for all uncontrolled CV risk factors.

**Appendix Figures 1 & 2**

show risk-estimation algorithms for BP and aspirin use developed in a previous project (HL102144). The drug effects expected from clinical actions for aspirin use and for all available BP, lipid, and glucose drugs, have been previously quantified (HL102144) and are adjusted downward for patients already on intensive multidrug regimens for BP or glucose control.<sup>70, 71</sup> The previous work on

**Figure 2. Schematic Representation of Prioritized Clinical Decision Support (CV Wizard) Intervention Showing How Open Treatment Options are Identified, Prioritized, and Presented to Patients and Primary Care Physicians (PCPs)**

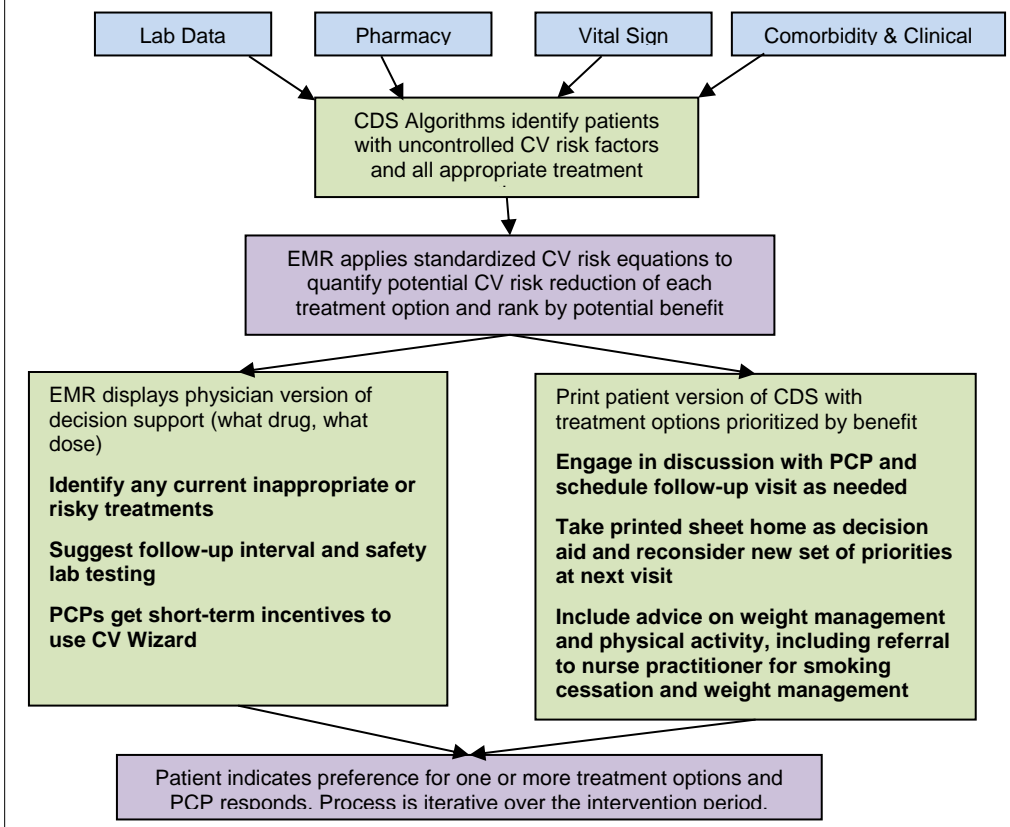

**Figure 3. Prototype of PCP Version of CV Wizard.**

| Diabetes Wizard - Optional Treatment Suggestions                                                                                                                                                                                                                                                                                                                                                                                                                                                                                                                                                                                            |          |            |                   |                                                                                                                                                                                                                                                                                                                                                                                                                                                                                                                   |             |                |                   |                                                                                                                                                                                                                                                                                                                                                                                  |       |                   |             |
|---------------------------------------------------------------------------------------------------------------------------------------------------------------------------------------------------------------------------------------------------------------------------------------------------------------------------------------------------------------------------------------------------------------------------------------------------------------------------------------------------------------------------------------------------------------------------------------------------------------------------------------------|----------|------------|-------------------|-------------------------------------------------------------------------------------------------------------------------------------------------------------------------------------------------------------------------------------------------------------------------------------------------------------------------------------------------------------------------------------------------------------------------------------------------------------------------------------------------------------------|-------------|----------------|-------------------|----------------------------------------------------------------------------------------------------------------------------------------------------------------------------------------------------------------------------------------------------------------------------------------------------------------------------------------------------------------------------------|-------|-------------------|-------------|
| Labs/Measurements                                                                                                                                                                                                                                                                                                                                                                                                                                                                                                                                                                                                                           |          | Dx         |                   | Meds                                                                                                                                                                                                                                                                                                                                                                                                                                                                                                              |             | Allergies      |                   | Other                                                                                                                                                                                                                                                                                                                                                                            |       | Run W/S           | W/S Results |
| MRN: 99546747 Name: POTTER,HARRY H Age: 62 Gender: M Date: 10/12/2011 10 Year CV Risk: 51%                                                                                                                                                                                                                                                                                                                                                                                                                                                                                                                                                  |          |            |                   |                                                                                                                                                                                                                                                                                                                                                                                                                                                                                                                   |             |                |                   |                                                                                                                                                                                                                                                                                                                                                                                  |       |                   |             |
| Measure:                                                                                                                                                                                                                                                                                                                                                                                                                                                                                                                                                                                                                                    | A1c (%)  | Cr (mg/dl) | eGFR (std)        | BP1 (mm Hg)                                                                                                                                                                                                                                                                                                                                                                                                                                                                                                       | BP2 (mm Hg) | CHF            | CHD               | LDL (mg/dl)                                                                                                                                                                                                                                                                                                                                                                      | HDL   | TRIG              |             |
| Value:                                                                                                                                                                                                                                                                                                                                                                                                                                                                                                                                                                                                                                      | 8.9      | 1.5        |                   | 163/84                                                                                                                                                                                                                                                                                                                                                                                                                                                                                                            | 161/83      | Not identified | Identified        | 96                                                                                                                                                                                                                                                                                                                                                                               |       |                   |             |
| Date:                                                                                                                                                                                                                                                                                                                                                                                                                                                                                                                                                                                                                                       | 6/3/2011 | 6/30/2011  |                   | 06/29/2011                                                                                                                                                                                                                                                                                                                                                                                                                                                                                                        | 05/28/2011  |                |                   | 6/3/2011                                                                                                                                                                                                                                                                                                                                                                         |       |                   |             |
| Goal:                                                                                                                                                                                                                                                                                                                                                                                                                                                                                                                                                                                                                                       | <=7.9    |            |                   | <=139/89                                                                                                                                                                                                                                                                                                                                                                                                                                                                                                          |             |                |                   | <=69 mg/dl                                                                                                                                                                                                                                                                                                                                                                       |       |                   |             |
| <b>Glucose/A1c</b>                                                                                                                                                                                                                                                                                                                                                                                                                                                                                                                                                                                                                          |          |            | <b>Priority 5</b> | <b>Blood Pressure</b>                                                                                                                                                                                                                                                                                                                                                                                                                                                                                             |             |                | <b>Priority 3</b> | <b>Lipids</b>                                                                                                                                                                                                                                                                                                                                                                    |       | <b>Priority 4</b> |             |
| CV Risk Reduction: 3                                                                                                                                                                                                                                                                                                                                                                                                                                                                                                                                                                                                                        |          |            |                   | CV Risk Reduction: 9                                                                                                                                                                                                                                                                                                                                                                                                                                                                                              |             |                |                   | CV Risk Reduction: 9                                                                                                                                                                                                                                                                                                                                                             |       |                   |             |
| Current Blood Sugar Med Categories:<br>- Metformin<br>- DPP4<br>- Thiazolidinedione                                                                                                                                                                                                                                                                                                                                                                                                                                                                                                                                                         |          |            |                   | Current BP Med Categories:<br>- None                                                                                                                                                                                                                                                                                                                                                                                                                                                                              |             |                |                   | Current Lipid Med Categories:<br>- Statin                                                                                                                                                                                                                                                                                                                                        |       |                   |             |
| Treatments to Consider: (The following treatment recommendations only apply to type 2 Diabetes)<br>Start a sulfonylurea (e.g. glimepiride 1-2 mg q.d.). Increase dose every 1-2 weeks to achieve blood sugar targets, up to 4 mg a day.<br>Start basal insulin, e.g. glargine 5-10 units once a day. Increase by 2-4 units every 4-5 days to achieve morning blood sugar targets (e.g. < 140 mg/dl).<br>Kidney function (GFR) is reduced. Consider stopping metformin in patients with significant renal impairment if concomitant medical or surgical problems are present.<br>Review kidney function and make sure that DPP4 inhibitor is |          |            |                   | Treatments to Consider:<br>Start a diuretic (e.g. chlorthalidone 25 mg a day).<br>Start an ACE inhibitor or angiotensin receptor blocker (ARB) (e.g. lisinopril 10 mg or losartan 50 mg a day).<br>Start a beta blocker (e.g. atenolol 25 mg a day).<br>BP is more than 20/10 mm Hg over goal, consider starting 2 blood pressure medication classes.<br>Beta blockers may be preferred drugs in patients with a history of coronary heart disease.<br>Diuretics are recommended as first line drug treatment for |             |                |                   | Safety Alerts:<br>Patients that require a greater reduction in LDL than can be achieved with simvastatin 40 mg/dl should be given an alternate statin (e.g. atorvastatin or rosuvastatin).<br>Treatments to Consider:<br>The patients LDL is > 70 mg/dl. Consider intensifying statin therapy (increase dose of existing statin or prescribe a more potent statin).<br>Comments: |       |                   |             |
| <b>BMI</b>                                                                                                                                                                                                                                                                                                                                                                                                                                                                                                                                                                                                                                  |          |            | <b>Priority 6</b> | <b>Smoking</b>                                                                                                                                                                                                                                                                                                                                                                                                                                                                                                    |             |                | <b>Priority 1</b> | <b>Aspirin Use</b>                                                                                                                                                                                                                                                                                                                                                               |       | <b>Priority 2</b> |             |
| CV Risk Reduction: 3 BMI: 30                                                                                                                                                                                                                                                                                                                                                                                                                                                                                                                                                                                                                |          |            |                   | CV Risk Reduction: 21                                                                                                                                                                                                                                                                                                                                                                                                                                                                                             |             |                |                   | CV Risk Reduction: 10                                                                                                                                                                                                                                                                                                                                                            |       |                   |             |
| Discuss advantages of reducing the patients BMI by a minimum of 3 points. Slines witch coaches and ph #                                                                                                                                                                                                                                                                                                                                                                                                                                                                                                                                     |          |            |                   | Discuss the many health benefits of quitting smoking.                                                                                                                                                                                                                                                                                                                                                                                                                                                             |             |                |                   | Aspirin is recommended for patients with coronary heart disease. Consider advising the patient to take a daily aspirin and/or documenting aspirin on the current medication list.                                                                                                                                                                                                |       |                   |             |
| Print Form                                                                                                                                                                                                                                                                                                                                                                                                                                                                                                                                                                                                                                  |          | DMWizard   |                   |                                                                                                                                                                                                                                                                                                                                                                                                                                                                                                                   |             |                |                   |                                                                                                                                                                                                                                                                                                                                                                                  | Close |                   |             |

344 these algorithms makes the proposed project feasible within the proposed timeline and increases the return to  
345 the funding agency for building this project on a strong foundation of previous research done by our team.

346 **Step 2. Identify Patients with SMI who May Benefit from SMI Medication Review, and Refer Them to**  
347 **Psychiatric Nurse Care Manager.** The CDS algorithms identify patients who take selected medications for  
348 SMI and have gained  $\geq 7\%$  of their body weight in the previous 12 months or have a BMI  $\geq 35$ . The PCP,  
349 psychiatric nurse care manager, and treating psychiatrist (if in the same medical group) also receive the CDS  
350 information related to SMI medications and other CV risk factors. The PCP is prompted to inform the patient  
351 that a discussion of SMI medications with the nurse care manager and the treating psychiatrist may be  
352 indicated, and a referral to the nurse care manager is made. The nurse care manager facilitates  
353 communication among the patient, PCP, and behavioral health provider and, guided by treatment algorithms  
354 specific to bipolar disorder, schizophrenia, and schizophrenia, convey concerns about the SMI medication and  
355 possible alternatives to the treating psychiatrist. **PCPs will not recommend changes in SMI medications.**

356 **Step 3: Identify Available Treatment Options for Each Uncontrolled Modifiable CV Risk Factor:** A second  
357 set of Web-based algorithms (example prototypes in **Appendix Figures 1 and 2**) identify evidence-based  
358 treatment options to address each uncontrolled CV risk factor. These algorithms have been tested in two  
359 previous research projects and are maintained on the Wizard Web service and updated (and revalidated) as  
360 needed to reflect changes in recommended treatments based on modifications in guidelines, evidence, and/or  
361 changes in FDA-indicated uses of certain drugs or classes of drugs.

362 Pharmacologic treatment recommendations in CV Wizard are directed at CV risk factor control and based on  
363 (a) all current prescriptions for BP, lipid, and glucose-control medications and aspirin, smoking cessation  
364 medications, and obesogenic SMI medications, (b) available information on the patient's renal or liver function,  
365 creatine kinase level, and established diagnoses of diabetes, congestive heart failure, or coronary heart  
366 disease, (c) personally assigned BP, A1c, and lipid goals based on comorbidity and other factors (risk of  
367 hypoglycemia, intensity of current glucose, BP or lipid regimen), and (d) medication allergies listed in the EMR.  
368 Medication recommendations are specific (what drug, what dose) and are based on evidence-based clinical  
369 protocols and decision rules developed by our team in previous research projects. These protocols and rules  
370 are derived from the evidence-based national and regional (Institute for Clinical Systems Improvement) clinical  
371 guidelines for glucose, BP, and lipid control, aspirin use, smoking cessation and obesity management.<sup>72-80</sup>

372 If inappropriate, CV-related pharmacotherapy or risky prescribing events (including those related to SMI  
373 medications, such as concomitant use of lithium carbonate and a diuretic) are identified, CV Wizard will flag  
374 them and suggest alternative clinical actions (in the example, substitute a safer BP-lowering agent for the  
375 diuretic). A list of prescribing events and a protocol of pharmacotherapy intensification advice given for several  
376 hundred clinical scenarios has been tested in a previous project and reported by our group,<sup>81-83</sup> and we will  
377 develop a similar list of risky prescribing events specific to the SMI population in phase 1 of this study.

378 Lifestyle treatment recommendations are also provided, when appropriate. If lifestyle interventions are  
379 indicated for smoking or body mass index (BMI) management, and the patient indicates interest, the PCP uses  
380 a link in the CV Wizard to refer the patient directly to existing services at each site. Research shows that  
381 standard interventions for weight loss or smoking cessation are not often offered to patients with SMI, but that  
382 when they are, they can successfully make significant life changes.<sup>38, 84</sup> In this project, the nurse care manager  
383 will receive training in weight management and tobacco cessation and reinforce them as indicated.

384 **Step 4: Present Prioritized CV Risk Reduction Options and SMI Treatment Review Recommendations**  
385 **to PCPs and Patients.** Prioritized CDS is provided to PCPs and patients using tested interface formats and a  
386 sequence of office staff steps successfully implemented in previous studies. **Participating PCPs and all**  
387 **rooming nurses in intervention clinics are trained to use the PCP and patient interfaces of CV Wizard,** and will  
388 take the following steps at each visit: (i) After entering vital sign data, CV Wizard automatically presents the  
389 interface screen to the nurse (with no prompts or trigger needed). The rooming nurse prints the **patient and**  
390 **PCP versions** of the CDS sheet. (ii) If a patient's mental and physical status appears stable, the nurse hands  
391 the patient sheet (**Figure 4**) and says, "This sheet shows how you can reduce your danger of a stroke or heart  
392 attack. Circle any of the things you might want to work on, and let the doctor know during your visit today." (iii)  
393 A printed version of the PCP CDS (**Figure 3**) is placed in the basket outside the exam room for rapid review by  
394 the PCP before entering the exam room. If preferred, the PCP CDS interface is displayed on the EMR screen

when the PCP enters the room and can be viewed by pressing a button on the EMR navigator bar. (iv) The PCP assesses patient preference for the prioritized CV risk-reduction options. If the patient wants to act on one or more, the PCP can address them immediately or schedule another visit.

**PCP Version.** CDS provided to the PCP is very specific and identifies and prioritizes treatment options that will, if implemented successfully, reduce CV risk (Figure 3). If CV risk-reduction opportunities are identified, the CDS algorithms will specify either initiation or titration of specific drugs based on current medications, distance from goal, and other clinical and comorbidity considerations outlined above. The new interface developed for this project will include a special section reserved for SMI medication review, if indicated. The PCP views this interface before entering the exam room and uses it as a powerful visit-planning tool.

**Patient Version.** The patient version has a visual display of risk derived from Framingham risk equations and other risk-estimation tools (Figure 4).<sup>68, 85, 86</sup> This has been used on a pilot basis in earlier studies, has been well-received by patients with and without SMI, does not heavily depend on numeracy, and has been shown to be strongly motivational.<sup>87-89,90, 91</sup> One display panel (not shown) is reserved to indicate whether a review of SMI medications may be beneficial. If so, the text will read "You may benefit from reviewing your psychiatric medication(s) with your psychiatrist. A nurse care manager will communicate with you in the next 2 weeks to discuss this."

Figure 4. Prototype Patient Version of CV Wizard.

| Bad Cholesterol - LDL Goal 99 mg or less |             | Blood Pressure - BP Goal 139/89 or less |             | Blood Sugar - A1c Goal 7.9% or less |             |
|------------------------------------------|-------------|-----------------------------------------|-------------|-------------------------------------|-------------|
| Date                                     | Your Status | Date                                    | Your Status | Date                                | Your Status |
| 5/6/2011                                 | 105         | 04/23/2011                              | 161/87      | 5/6/2011                            | 8.9         |
| Weight                                   |             | Smoking                                 |             | Aspirin Use                         |             |
| Date                                     | Your Status | Date                                    | Your Status | Date                                | Your Status |
| 04/23/2011                               | 261         | 11/01/2011                              | YES         |                                     |             |

**Incorporating Patient Preference.**

A key design feature of the patient interface is the presentation of several prioritized treatment options directly to the patient for consideration. Patient preference is elicited simply by asking the patient if they are interested in any of the identified treatment options. Because patient readiness to take health-related actions varies with specific actions, offering several options improves the chance that a given patient may be interested in addressing at least one of them. Moreover, patient readiness to act is a key predictor of subsequent adherence and success of treatment, as we and others have shown.<sup>92-97</sup>

**Step 5: Nurse-Supported Medication Switch Protocol.** In the subset of patients for whom the Wizard recommends a change in antipsychotic or mood stabilizer medication, a copy of the PCP and patient interfaces are sent automatically to the psychiatric nurse care manager. The psychiatric nurse care manager will (under supervision by and with the approval of the prescribing psychiatrist and consent of the patient) implement a step-wise medication transition protocol (developed in Phase 1) involving weekly standardized telephone assessments of potential adverse effects or indications of symptom breakthrough. In the subset of patients identified for psychiatric medication review, special attention will be given to SMI medication adherence and persistence, trajectory of CV risk factors, and frequency of mental health hospitalizations. However, substantial literature has documented the safety and effectiveness of psychiatric nurse care managers in the care of patients with depression and SMI.<sup>98-100</sup>

**Step 6: Strategies to Ensure High Use of CV Wizard.** We will implement three strategies to ensure high use rates for CV Wizard: (A) The Wizard screen includes a visit-resolution form that invites the PCP to click, before closing the encounter, one of three boxes: (1) action taken based on Wizard recommendations, (2) other CV risk-reduction action taken, or (3) no CV risk-reduction action taken. If box (3) is clicked, another box must be clicked to indicate why no action was taken. This tool serves multiple purposes: it incentivizes the PCP to take action to avoid additional clicks, allows us to track the percentage of visits each intervention group PCP is using Wizard, and gives feedback to PCPs and clinic leaders on comparative use of CV Wizard. (B)

447 Benchmarking feedback is given to PCPs on their use of CV Wizard, and medical group leaders at each site  
448 will communicate this feedback to each PCP by email every month. (C) Intervention clinics will modify nurse  
449 rooming procedures—a change authorized and supported by clinical leaders at each site. (D) The rooming  
450 nurses at each clinic will receive one-time compensation of \$350 as a group if, in the first 6 months after CV  
451 Wizard implementation at their clinic, the CV Wizard interface sheets for the PCP and patient are printed at  
452  $\geq 80\%$  of the visits of patients with SMI. In addition, each site will approve an explicit protocol for psychiatric  
453 nurse care manager communication with treating psychiatrists, PCPs, and patients. These strategies are  
454 designed to reinforce office nurse, PCP, and psychiatric nurse care manager adherence to study protocols.

455 **Step 7: Interactive Use of the CV Wizard CDS over a Series of Visits.** PCPs will use CV Wizard repeatedly  
456 at all visits of eligible patients over the intervention period of 18-30 months, depending on site. Pilot data from  
457 HealthPartners indicate that adults with SMI who have a PCP (75% do) make an average of  $\geq 5$  primary care  
458 visits over 24 months, and those who can be engaged in CV risk-reduction activities may visit even more  
459 often.<sup>78, 101</sup> We and others have shown that there is substantial relapse to uncontrolled risk-factor status (BP,  
460 lipids, smoking, aspirin use, and glucose control) over time. In diabetes patients, for example, about 30% of  
461 those with adequate glucose control relapse to elevated levels of glucose within 1 year.<sup>101</sup> CV Wizard identifies  
462 and responds to any relapse in CV risk-factor control at each visit. Moreover, with respect to tobacco cessation  
463 or weight management, patient preferences are incorporated explicitly into the patient interface. For most  
464 patients with SMI in the study, PCPs will have multiple opportunities to consider and implement clinical actions  
465 to reduce CV risk over a series of visits during the intervention period.

#### 466 **Implementation of CV Wizard Intervention**

467 In **Phase 1**, we will work closely with clinical leaders, clinic managers, programmers, and IT experts at each  
468 site to revise CV Wizard and refine the intervention protocol. Once the initial programming is complete, we will  
469 create a series of “dummy” patients with varying CV risk profiles (eg, elevated BP, smoking, candidates for  
470 change in psychotropic medications). Clinical investigators (Rossom, Druss, Luepker, and O'Connor) will test  
471 the functionality of our algorithms and assess the appropriateness of the CDS. After several rounds of testing  
472 and modifications, we will recruit three HealthPartners clinics not included in the study and pilot-test CV Wizard  
473 at each clinic for 4 weeks. Pilot-test PCPs and nurses will be asked to complete online surveys and provide  
474 within-Wizard feedback on their experience with the CDS tool, including the clinical plausibility and utility of  
475 prompts and their impact on clinic workflow. After pilot testing of CV Wizard, the project will enter Phase 2.

476 Following block randomization of clinics at the start of **Phase 2**, we will train intervention clinics to use CV  
477 Wizard using strategies similar to those routinely used to introduce any new EMR functionality. These include  
478 group and individual meetings with all PCPs, rooming nurses, and other primary care clinic staff, and email  
479 reminders with links to a PowerPoint presentation demonstrating tool use. Training sessions via webinar will  
480 also be provided for psychiatrists at each site. Psychiatric nurse care managers will be trained separately by  
481 webinar in three sequential 4-hour trainings sessions that include site-specific methods to communicate with  
482 within- and outside-group treating psychiatrists. Training will be complete and CV Wizard fully implemented at  
483 all intervention clinics within 60 days of randomized group assignment of clinics at each site. Following  
484 implementation, all intervention clinic staff will receive monthly email feedback on use of CV Wizard. Surveys  
485 of all providers at intervention and control clinics to assess SMI-related knowledge and beliefs will be  
486 conducted at baseline and 12 months after clinic randomization. PCP survey data will be used to identify  
487 factors that may mediate the impact of CV Wizard.

488 In addition, we will conduct surveys with a subset of subjects referred to the nurse care manager for  
489 medication review to determine: 1) satisfaction with the intervention; 2) their decision to continue current  
490 medications or switch medications, and why; 3) whether they felt included in medication and care decisions; 4)  
491 whether they perceived benefit from the intervention; 5) level of activity and quality of their diet; 6) what they  
492 identify as the most significant contributors to their weight gain; 7) whether they experienced adverse  
493 outcomes (eg, psychiatric destabilization and/or hospitalization); 8) perceived barriers in obtaining primary and  
494 mental health care; 9) suggestions for improving the EMR patient interface or the care manager intervention.

#### 495 **Measurement of Dependent Variables**

496 **CV Risk (Hypothesis 1).** The Framingham 10-year CV Disease Risk Equation will be used to estimate the 10-  
497 year CV risk for each adult patient with SMI<sup>102</sup> and calculated every time a constituent modifiable risk factor is  
498 recorded in the EMR during the intervention period. An index CV risk score will be calculated from data

elements valid at each patient's first primary care visit after randomization of his/her primary care clinic. All patients who meet the study inclusion criteria and have an index modifiable CV risk score >0 will be included in the analytic dataset. At each encounter, we will extract from the EMR the most recent data elements for computing CV risk, looking back over a period appropriate for each risk component (ie, 12 months for A1c, BP, aspirin, smoking, BMI; 48 months for lipids). Risk factors that are unavailable and prevent CV risk calculation will be multiply imputed from a congenial imputation model (see "Missing Data" for details) so that CV risk scores may be calculated for all patients from updated valid and imputed risk factors. The series of CV risk scores will enable person-specific CV risk trajectories to be estimated and compared among patients treated in CV Wizard clinics relative to control clinics. A comparison of model-predicted 12-month post-index CV risk scores demonstrating lower modifiable CV risk in patients in the CV Wizard relative to control clinics will support the primary efficacy of Hypothesis 1.

**Modifiable CV Risk factors (Hypothesis 2).** Each modifiable CV risk factor recorded in the EMR from those included in the index CV risk estimation through the end of the intervention period will be retained. Person-specific trajectories for each risk factor will be estimated from EMR-recorded risk factors (ie, no imputed values) and compared across clinic-randomized treatment groups.

**Obesogenic SMI Medications.** Each patient will be classified as having an open prescription for an obesogenic SMI medication at baseline if there was a combination of fill date and days' supply for a defined set of obesogenic atypical antipsychotic or mood stabilizer medications that overlaps with the date of the patient's first primary care visit after randomization of his/her primary care clinic. A comparable 12-month measure will be calculated. The obesogenic agents included in these calculations are valproic acid, olanzapine, clozapine, thioridazine, chlorpromazine, lithium, quetiapine, and risperidone. The proportion of patients with an open prescription for an obesogenic SMI medication will be compared across clinic-randomized treatment groups.

**Dependent Variables: Secondary Analyses.** A detailed description of dependent variables that will be included in secondary analyses, some of which will pinpoint factors that mediate intervention efficacy is found in **Appendix Table 1**. We postulate that the benefits of CV Wizard will be mediated in part by higher rates of treatment intensification at visits with uncontrolled CV risk factors and will therefore assess (a) BP, glucose, and lipid treatment; and (b) BP, glucose, and lipid treatment intensification at visits with uncontrolled BP, glucose, or lipids. Additional mediating factors include (c) adherence to antipsychotics and mood stabilizers; and (d) number of outpatient and inpatient encounters (total and related to SMI), if CV Wizard increases number of outpatient visits, email visits, emergency department visits, or hospitalizations. CV Wizard might increase the frequency of inappropriate or risky drug prescribing; therefore, we will quantify occurrence of (e) potentially risky prescribing events using methods similar to those we previously published.<sup>81-83</sup> Finally, EMR and claims data will quantify the occurrence and date of (f) major CV events (including fatal and nonfatal heart attack or stroke, total mortality, hospitalized congestive heart failure, and revascularization procedures) so that the occurrence and time to event can be assessed. It is unlikely that the study has power to detect changes in CV events, but we will assess available data in secondary analysis.

**Measurement of Independent Variables.** (Detailed table found in **Appendix Table 1**)

**Primary Predictors.** The primary predictor of CV risk trajectories is a binary indicator for whether the clinic in which the patient is seen was randomly assigned to the CV Wizard or control study arm. To test Hypotheses 1 and 2, a second predictor will quantify the time elapsed from the patient's first post-randomization clinic visit, at which time the index CV risk score was calculated, to each point-in-time CV risk score. For Hypothesis 3, a binary indicator will denote whether outcomes were assessed at index or 12 months later.

**Patient and Provider Characteristics.** Patient and provider characteristics will be documented so we can assess the extent to which results apply to subgroups of patients or whether patient or provider characteristics modify intervention efficacy. Also, clinic randomization may induce random and selection-induced patient covariate imbalance, necessitating adjustment. Patient characteristics from the EMR (for patients) and health plan data sources (for member-patients) include: health plan enrollment and pharmacy coverage dates, demographics, pre-intervention comorbidities (derived from dated ICD-9 codes), vital signs, height, BMI, laboratory values, and prescribed and filled medications. Furthermore, primary care visit dates will link patients and PCPs. We will have complete data for a set of provider characteristics, including age, years since graduation, gender, full-time or part-time status, physician or allied provider (ie, nurse practitioner), specialty board certification status, years with HPMG/KPGA/Essentia, and number and proportion of patients with SMI.

We will also collect data on the percentage of applicable encounters where CV Wizard was printed and/or viewed, and the percentage of encounters with an opened CV Wizard where CV risk factors were addressed.

### **Analysis Plan.**

**Hypotheses 1 and 2.** H1 and H2 pertain to the efficacy of CV Wizard in improving CV risk and individual risk-factor trajectories. H1 and H2 will be tested using a random coefficients model in which estimated CV risk scores (H1) or factors (H2) will be predicted from clinic-randomized treatment group (WIZARD), time elapsed since index CV risk score (YEAR), and treatment-by-time interaction. The most basic form of the H1 and H2 models will be:  $CV\ risk_{kjit} = \gamma_{0000} + \gamma_{1000}WIZARD_k + \gamma_{0001}YEAR_t + \gamma_{1001}WIZARD_k*YEAR_t +$

$$\gamma_{2000}KPGA_k + \gamma_{3000}EH_k + [w_{k000} + v_{kj00} + u_{kji0} + u_{kji1}*YEAR_t + e_{kjit}],$$

where there are fixed effects for MHRN site; CV risk varies randomly across clinics ( $w_{k000}$ ), providers ( $v_{kj00}$ ), patients ( $u_{kji0}$ ), and time ( $e_{kjit}$ ), and the relationship between time and CV risk varies randomly across patients ( $u_{kji1}*YEAR_t$ ). These outcomes are expected to be normally or binomially distributed, although the suitability of alternate distributions (eg, negative binomial) and link functions (eg, log) will be assessed should they depart from their expected distributions. YEAR will be coded on a linear scale [(days since index)/365.25] so 0=index and 1=12 months, which should be sufficient to model change in CV risk over time. Quadratic or cubic terms will be tested and added if CV risk trajectories are nonlinear. Parameter  $\gamma_{0001}$  is expected to be near zero, indicating that, among control patients, CV risk did not change over time. Parameter  $\gamma_{1001}$  quantifies the change in CV risk expected at 12 months (when YEAR=1) among WIZARD versus control patients. If  $\gamma_{1001}$  is significant, a planned contrast will test the difference in CV risk outcomes in WIZARD relative to control patients at 12 months. H1 and H2 will be supported if  $\gamma_{1001}$  is significant and negative, and the planned contrast confirms lower predicted CV risk scores at 12 months in WIZARD versus control patients.

**Hypothesis 3.** The H3 analyses will predict the presence of an open prescription for an obesogenic SMI medication in patients with a 7% or more weight gain in the previous 12 months or whose most recent BMI  $\geq 35$  kg/m<sup>2</sup>. Each patient will be included in the analysis for the time points at which they met either criterion. The likelihood of an obesogenic SMI medication will be predicted from clinic-randomized treatment group (WIZARD), assessment point (12m), and the treatment by assessment point interaction. The H3 model,

$$Prob(obesogenic\ SMI\ medication)_{kjit} = \gamma_{0000} + \gamma_{1000}WIZARD_k + \gamma_{0001}12m_t + \gamma_{1001}WIZARD_k*12m_t +$$

$$\gamma_{2000}KPGA_k + \gamma_{3000}EH_k + \gamma_{0010}BMI>35_i + [w_{k000} + v_{kj00} + u_{kji0} + e_{kjit}],$$

will specify a binomial error distribution and logit link function, and account for whether the patient BMI  $\geq 35$  kg/m<sup>2</sup>, in addition to the H1 and H2 model parameters. Due to clinic randomization, the likelihood of a patient taking one of these medications should be similar across treatment groups at index (non-significant  $\gamma_{1000}$ ) and, without intervention, be stable over time (nonsignificant  $\gamma_{0001}$ ). Parameter  $\gamma_{1001}$  is expected to be significant and negative, implying that CV Wizard patients are less likely than control patients to have an open prescription for an obesogenic SMI medication 12 months after an index visit.

**Sample size justification.** We conducted a power analysis with PinT software<sup>103</sup> to estimate the standard error of random parameter  $\gamma_{1001}$  in the H1 and H2 models so the regression parameter representing the minimum detectable standardized effect (MDSE) could be calculated. The H1 and H2 data will consist of about four CV risk observations per person per year (using Table 1 preliminary data) in each of about 2,250 patients with SMI receiving primary care in one of 52 randomly assigned clinics. The correlated sample size of  $N \approx 2,250$  was reduced to an equivalent independent sample size by dividing N by the design effect introduced by patients being clustered within clinics ( $N_{eff} = N / [1 + (n_{clus} - 1)\rho]$ ). The effective sample size  $N_{eff} \approx 1,219$  to 1,582 (when  $\rho = .01-.02$ ), expected number of observations per person, and assumptions regarding the within-person covariance matrix, the residual variance in CV risk (97.5% residual), and the random covariance matrix (proportion of residual variance in CV risk at person level, residual slope variance, intercept-slope covariance) formed the basis of power analyses for each CV risk factor. We assumed that the analytic model would explain 2.5% of the variance in each outcome, and the proportion of variance at person and time levels of the model were based on preliminary data (eg, person-level  $ICC_{DBP} = .35$  through  $ICC_{weight} = .88$ ). The estimated standard errors of  $\gamma_{1001}$  were .028 to .039, which implies MDSEs of  $d \approx .047-.068$  (power = .80,  $\alpha_2 = .05$ ). These estimates were consistent in a range of assumptions of patient sample size, person-level residual variance, slope variance, and intercept-slope covariance. Therefore, we anticipate the H1 and H2 analyses will be sufficiently powered to detect small differences ( $d < .10$ ) in CV risk and CV risk factors among CV Wizard versus control patients 12 months after exposure to the intervention.

603 For H3, we anticipate that 50% of adult patients with SMI will have experienced a 7% weight gain over 12  
604 months or have BMI  $\geq 35 \text{ kg/m}^2$  at any point. In our pilot, about 70% of patients with SMI were on an  
605 antipsychotic or a mood stabilizer, and about 40% of them were obesogenic. We expect, then, that without  
606 intervention, about  $70\% \times 40\% \approx 30\%$  of patients will have an open prescription for an obesogenic SMI  
607 medication at one point. Assuming that the clinic-level  $\text{ICC}_{\text{weight}} = .01 - .02$  among the  $N \approx 2250 \times .50 \approx 1,125$   
608 patients eligible for inclusion at each point,  $\text{Neff} = 796 - 933$ . Comparison of CV Wizard to control patients will be  
609 powered to detect an absolute 8.0%-8.7% reduction (eg, 21.3%-22.0% CV Wizard vs. 30% control) in the  
610 proportion of patients with an open prescription for an obesogenic medication at 12 months.

611 **Missing data.** Because all data elements will be drawn from EMR and health plan records, they will be high-  
612 quality and available for virtually all patients. Missing data will be rare and can be assumed to be missing at  
613 random. The absence of measured risk factors necessary for computing 10-year CV risk will result from its lack  
614 of measurement. One concern regarding absent risk-factor measures (eg, LDL values) is that tests are more  
615 likely to be performed for patients with known or suspected medical conditions, creating an upward bias in CV  
616 risk estimates. There was no evidence of such bias in the central tendency or dispersion of the risk-factor  
617 distributions in the preliminary data. However, should the CV Wizard increase CV risk factor monitoring, we  
618 may conduct a secondary analysis on data from CV Wizard and control patients, propensity-matched on  
619 characteristics that assess primary care involvement primary care (eg, numbers of visits, tests, medications).  
620 Because 10-year CV risk will be calculated from risk factors measured in variable-specific timeframes, lack of  
621 measurement of a single risk factor could prevent CV risk calculation. To prevent this, we will multiply impute  
622 missing risk factors necessary for computing CV risk from all variables in the primary analytic model,<sup>104, 105</sup>  
623 including random effects (ie, congenial imputation model with random effects<sup>106</sup>), and other risk factors and  
624 patient characteristics that may improve the precision of the imputations using fully conditional specification.

625 **Secondary analyses.** The primary analytic model is sufficiently flexible to accommodate non-Gaussian data  
626 by specifying alternate error distributions and link functions. As such, secondary efficacy outcomes (eg,  
627 medication adherence, safety outcomes, risky prescribing events) will be analyzed using comparable  
628 approaches as for the primary analyses, with distributional accommodations as needed. Sub-analyses using  
629 the same analytic approach but limited to a) intervention patients whose providers acted based on CV Wizard  
630 recommendations or took other CV action, and b) propensity-matched patients, will estimate the maximum  
631 effect of the CV Wizard intervention. Medication will be assessed via a product of coefficients approach<sup>107, 108</sup>  
632 using comparable mixed models to estimate the strength of relationships among predictors, mediators, and  
633 outcomes. The strength of indirect effects will be calculated from model-derived coefficients and its significance  
634 tested by constructing asymmetric 95% confidence intervals<sup>109, 110</sup> to determine if its limits include 0.

635 **Organization of Project.** The organizational chart and project timeline are provided in the budget justification  
636 section of this grant. As PI, Dr. Rossom will lead weekly meetings with the research team (Drs. Owen-Smith,  
637 Waring, O'Connor, and Crain, EMR programmers from each site, Web programmers, and project managers) to  
638 ensure that all necessary tasks are completed in a timely fashion and strictly according to study protocol. In  
639 addition, Dr. Rossom will conduct data meetings with the EMR and Web programmers weekly in the first 30  
640 months of the project and biweekly thereafter to deal with operational issues related to development and  
641 implementation of the intervention tool (in Phase 1) and with data and analysis issues throughout the project.  
642 Additional clinicians and consultants, including Drs. Trangle, Druss, Luepker, and O'Connor will join the  
643 research team meetings to give clinical input and other guidance as needed at certain stages of the project.

644 In **Phase 1** (Months 0-18), we will develop, pilot, and revise the EMR-based CDS intervention, including the  
645 EMR-based algorithms that identify and extract data in real time and the Web service algorithms that process  
646 this information and return it to the EMR for retention and display. In **Phase 2** (Months 18 to 48), clinics are  
647 randomly assigned and providers trained to use intervention tools in a staggered implementation design to  
648 allow each site to learn lessons from the site(s) implementing the intervention previous and increase efficiency.  
649 To that end, HealthPartners clinics will implement CV Wizard in month 18, Kaiser Georgia in month 24, and  
650 Essentia in month 30. The impact of the intervention on clinical actions, the possible maintenance or decay of  
651 intervention effects, and post-intervention PCP satisfaction are monitored over the entirety of the intervention  
652 period for a mean of 24 months study-wide. **Phase 3** (Months 48 to 60) involves final data collection, including  
653 all clinical outcomes, data analysis, reporting of key study results, and implementation of the intervention in  
654 non-intervention clinics, if care partners request (as expected). Throughout the study, data will be analyzed as

655 they become available, and preliminary reports on the study's conceptual models, intervention strategies, and  
656 preliminary results will be reported at meetings and in peer-reviewed articles.

### 657 **Strengths and Limitations of the Study**

658 A few limitations to this proposal should be noted: (1) The completeness of EMR-derived data is a challenge.  
659 However, study subjects have a single EMR used by all providers at each site, and most receive nearly all their  
660 care at that site. We have worked extensively with EMR-derived data in patients with depression, diabetes, and  
661 heart disease in previous research, and this experience informs our approach to missing data and accurate  
662 identification of those with SMI. (2) Although the patient population is large and diverse, it does not include the  
663 uninsured; some may argue that this may exclude patients with more severe SMI who are more likely to be  
664 uninsured or inconsistently insured. (3) No CV risk-estimation equation is perfectly suited to the needs of  
665 patients with SMI, and the Framingham equations may overestimate index risk and underestimate risk  
666 reduction catalyzed by CV Wizard because it will miss actions such as use of aspirin and improved glucose  
667 control. However, we compensate for this by quantifying changes in key CV risk factors separately in  
668 Hypothesis 2, which is a very highly powered analysis, using the UKPDS risk equation for changes in A1c  
669 control and the USPSTF aspirin algorithms, which rely on the Framingham 10-year CVD Risk Equation.<sup>111, 112</sup>  
670 (4) Including preferences of patients with SMI may be a challenge. However, we have substantial experience in  
671 this area,<sup>92, 113,94,114</sup> and previous studies suggest that shared decision making can improve clinical outcomes in  
672 patients with chronic conditions.<sup>115</sup> (5) The effectiveness of our recommended lifestyle interventions remains  
673 uncertain. Some regard lifestyle interventions as ineffective, but a growing body of evidence suggests  
674 commonly available lifestyle interventions and support may positively affect weight, physical activity, and  
675 tobacco use in adults, including those with SMI.<sup>116-120</sup>

676 These potential limitations should be weighed against the strengths of this ambitious, timely, and innovative  
677 project. Our health care system invests billions of dollars each year in EMR systems that have failed to deliver  
678 clinical benefits to patients with SMI in outpatient settings.<sup>121-126</sup> In previous NIH-funded projects, we have  
679 developed an EMR-based, Web-supported CDS system proven to improve BP and glucose control in type 2  
680 diabetes patients in a randomized trial. Pilot data from DK068314 indicate improvement in CV risk factors  
681 among a small subset of patients with SMI enrolled in the intervention arm relative to those enrolled in the  
682 control arm. Our track record supports our ability to successfully conduct this ambitious and important project.  
683 Key elements of the intervention strategy have already been successfully used, enabling us to immediately  
684 focus on substantial enhancements to extend the model to our population with SMI, develop maximally  
685 effective psychiatric nurse care manager interventions to help patients with SMI switch SMI medications under  
686 supervision of the treating psychiatrist when appropriate, including the development of switching algorithms to  
687 guide providers, and incorporate patient preference in the process.

### 688 **Dissemination and Future Applications**

689 The Dissemination Team will meet regularly in the second half of the grant, and will be tasked with ensuring  
690 widespread dissemination of our findings. There are many venues readily available to us for useful  
691 dissemination; for example, our consultants, Drs. Druss, Luepker, and Trangle, are national leaders in mental  
692 health and cardiology and will help ensure regional and national dissemination of results. Additionally, MHRN is  
693 an active network whose member organizations have regional and national connections to organizations and  
694 collaboratives across the country, including the National Alliance on Mental Illness, the Depression and Bipolar  
695 Support Alliance, and the Institute for Clinical Systems Improvement, and these connections will be utilized to  
696 widely disseminate our results and spread of our intervention, if successful. In addition to these efforts, we will  
697 make good use of the peer-reviewed literature for more traditional dissemination of scientific information. Dr.  
698 Rossom will lead a Publications Committee as part of the Dissemination Team, which will develop and facilitate  
699 the development of many manuscripts keyed to the specific aims so as to ensure prompt and complete  
700 publication of as much important knowledge as possible.

701 Regarding future applications, the intervention strategy developed here can be extended to other mental health  
702 domains and care-delivery venues. Moreover, the Web-based CDS tools could be easily adapted for other  
703 purposes, including mapping quality of care at the provider or clinic level, improving coordination of medical  
704 care of patients with SMI, providing a framework for "patient-direct" applications delivered through the Internet,  
705 and using the CV Wizard in simulation mode to train a wide range of providers to deliver care that is  
706 simultaneously personalized and standardized to those with SMI.



1. Parks J, Svendsen D, Singer P, Foti M. Morbidity and Mortality in people with serious mental illness. Alexandria, VA2006. Available from: [http://www.nasmhpd.org/general\\_files/publications/med\\_directors\\_pubs/Technical%20Report%20on%20Morbidity%20and%20Mortality%20-%20Final%2011-06.pdf](http://www.nasmhpd.org/general_files/publications/med_directors_pubs/Technical%20Report%20on%20Morbidity%20and%20Mortality%20-%20Final%2011-06.pdf).
2. Weiner M, Warren L, Fiedorowicz JG. Cardiovascular morbidity and mortality in bipolar disorder. *Ann Clin Psychiatry*. 2011;23(1):40-7. Epub 2011/02/15. doi: acp\_2301f [pii]. PubMed PMID: 21318195; PubMed Central PMCID: PMC3190964.
3. Osborn DP, Levy G, Nazareth I, Petersen I, Islam A, King MB. Relative risk of cardiovascular and cancer mortality in people with severe mental illness from the United Kingdom's General Practice Research Database. *Arch Gen Psychiatry*. 2007;64(2):242-9. Epub 2007/02/07. doi: 10.1001/archpsyc.64.2.242. PubMed PMID: 17283292.
4. De Hert M, Dekker JM, Wood D, Kahl KG, Holt RI, Moller HJ. Cardiovascular disease and diabetes in people with severe mental illness position statement from the European Psychiatric Association (EPA), supported by the European Association for the Study of Diabetes (EASD) and the European Society of Cardiology (ESC). *Eur Psychiatry*. 2009;24(6):412-24. Epub 2009/08/18. doi: 10.1016/j.eurpsy.2009.01.005. PubMed PMID: 19682863.
5. O'Connor PJ, Crain AL, Rush WA, Sperl-Hillen JM, Gutenkauf JJ, Duncan JE. Impact of an electronic medical record on diabetes quality of care. *Ann Fam Med*. 2005;3(4):300-6. Epub 2005/07/28. doi: 3/4/300 [pii] 10.1370/afm.327. PubMed PMID: 16046561; PubMed Central PMCID: PMC1466905.
6. Osby U, Correia N, Brandt L, Ekbohm A, Sparen P. Mortality and causes of death in schizophrenia in Stockholm county, Sweden. *Schizophr Res*. 2000;45(1-2):21-8. Epub 2000/09/09. doi: S0920-9964(99)00191-7 [pii]. PubMed PMID: 10978869.
7. Hennekens CH, Hennekens AR, Hollar D, Casey DE. Schizophrenia and increased risks of cardiovascular disease. *Am Heart J*. 2005;150(6):1115-21. Epub 2005/12/13. doi: S0002-8703(05)00125-0 [pii] 10.1016/j.ahj.2005.02.007. PubMed PMID: 16338246.
8. Dixon L, Postrado L, Delahanty J, Fischer PJ, Lehman A. The association of medical comorbidity in schizophrenia with poor physical and mental health. *J Nerv Ment Dis*. 1999;187(8):496-502. Epub 1999/08/27. PubMed PMID: 10463067.
9. Davidson S, Judd F, Jolley D, Hocking B, Thompson S, Hyland B. Cardiovascular risk factors for people with mental illness. *Aust N Z J Psychiatry*. 2001;35(2):196-202. Epub 2001/04/04. doi: anp877 [pii]. PubMed PMID: 11284901.
10. Druss BG, Bradford WD, Rosenheck RA, Radford MJ, Krumholz HM. Quality of medical care and excess mortality in older patients with mental disorders. *Arch Gen Psychiatry*. 2001;58(6):565-72. Epub 2001/06/29. doi: yoa20211 [pii]. PubMed PMID: 11386985.
11. Trangle M, Gary M, Paul G, Christensen R. Minnesota 10 by 10. Reducing morbidity and mortality in people with serious mental illnesses. *Minn Med*. 2010;93(6):38-41. Epub 2010/09/11. PubMed PMID: 20827954.
12. Goff DC, Sullivan LM, McEvoy JP, Meyer JM, Nasrallah HA, Daumit GL, et al. A comparison of ten-year cardiac risk estimates in schizophrenia patients from the CATIE study and matched controls. *Schizophr Res*. 2005;80(1):45-53. Epub 2005/10/04. doi: 10.1016/j.schres.2005.08.010. PubMed PMID: 16198088.
13. Newcomer JW. Medical risk in patients with bipolar disorder and schizophrenia. *J Clin Psychiatry*. 2006;67 Suppl 9:25-30; discussion 6-42. Epub 2006/09/13. PubMed PMID: 16965186.
14. Kilbourne AM, Cornelius JR, Han X, Pincus HA, Shad M, Salloum I, et al. Burden of general medical conditions among individuals with bipolar disorder. *Bipolar Disord*. 2004;6(5):368-73. Epub 2004/09/24. doi: 10.1111/j.1399-5618.2004.00138.x. PubMed PMID: 15383128.
15. Birkenaes AB, Opjordsmoen S, Brunborg C, Engh JA, Jonsdottir H, Ringen PA, et al. The level of cardiovascular risk factors in bipolar disorder equals that of schizophrenia: a comparative study. *J Clin Psychiatry*. 2007;68(6):917-23. Epub 2007/06/27. PubMed PMID: 17592917.
16. Singer PWM, L.H. Modifiable risk factors: environmental, individual behaviors and lifestyle. Presentation. May 2006.
17. Wong CK, Tang EW, Herbison P, Birmingham B, Barclay L, Fu SY. Pre-existent depression in the 2 weeks before an acute coronary syndrome can be associated with delayed presentation of the heart attack. *QJM*. 2008;101(2):137-44. Epub 2008/01/12. doi: 10.1093/qjmed/hcm153. PubMed PMID: 18187481.

- 760 18. Druss BG. Improving medical care for persons with serious mental illness: challenges and solutions. *J*  
761 *Clin Psychiatry*. 2007;68 Suppl 4:40-4. Epub 2007/08/19. PubMed PMID: 17539699.
- 762 19. Laursen TM, Munk-Olsen T, Agerbo E, Gasse C, Mortensen PB. Somatic hospital contacts, invasive  
763 cardiac procedures, and mortality from heart disease in patients with severe mental disorder. *Arch Gen*  
764 *Psychiatry*. 2009;66(7):713-20. Epub 2009/07/08. doi: 10.1001/archgenpsychiatry.2009.61. PubMed PMID:  
765 19581562.
- 766 20. Mackin P, Bishop DR, Watkinson HM. A prospective study of monitoring practices for metabolic  
767 disease in antipsychotic-treated community psychiatric patients. *BMC Psychiatry*. 2007;7:28. Epub 2007/06/27.  
768 doi: 10.1186/1471-244X-7-28. PubMed PMID: 17592636; PubMed Central PMCID: PMC1913512.
- 769 21. Shah SU, White A, White S, Littler WA. Heart and mind: (1) relationship between cardiovascular and  
770 psychiatric conditions. *Postgrad Med J*. 2004;80(950):683-9. Epub 2004/12/08. doi: 80/950/683 [pii]  
771 10.1136/pgmj.2003.014662. PubMed PMID: 15579605; PubMed Central PMCID: PMC1743159.
- 772 22. Sowden GL, Huffman JC. The impact of mental illness on cardiac outcomes: a review for the  
773 cardiologist. *Int J Cardiol*. 2009;132(1):30-7. Epub 2008/11/14. doi: 10.1016/j.ijcard.2008.10.002. PubMed  
774 PMID: 19004512.
- 775 23. Taylor V, MacQueen G. Associations between bipolar disorder and metabolic syndrome: A review. *J*  
776 *Clin Psychiatry*. 2006;67(7):1034-41. Epub 2006/08/08. PubMed PMID: 16889445.
- 777 24. Klumpers UM, Boom K, Janssen FM, Tulen JH, Loonen AJ. Cardiovascular risk factors in outpatients  
778 with bipolar disorder. *Pharmacopsychiatry*. 2004;37(5):211-6. Epub 2004/10/09. PubMed PMID: 15470799.
- 779 25. Consensus development conference on antipsychotic drugs and obesity and diabetes. *Diabetes Care*.  
780 2004;27(2):596-601. Epub 2004/01/30. PubMed PMID: 14747245.
- 781 26. Druss BG, Bradford DW, Rosenheck RA, Radford MJ, Krumholz HM. Mental disorders and use of  
782 cardiovascular procedures after myocardial infarction. *JAMA*. 2000;283(4):506-11. Epub 2000/02/05. doi:  
783 joc90746 [pii]. PubMed PMID: 10659877.
- 784 27. Frayne SM, Halanych JH, Miller DR, Wang F, Lin H, Pogach L, et al. Disparities in diabetes care:  
785 impact of mental illness. *Arch Intern Med*. 2005;165(22):2631-8. Epub 2005/12/14. doi:  
786 10.1001/archinte.165.22.2631. PubMed PMID: 16344421.
- 787 28. Desai MM, Rosenheck RA, Druss BG, Perlin JB. Mental disorders and quality of diabetes care in the  
788 veterans health administration. *Am J Psychiatry*. 2002;159(9):1584-90. Epub 2002/08/31. PubMed PMID:  
789 12202281.
- 790 29. Fagiolini A, Chengappa KN, Soreca I, Chang J. Bipolar disorder and the metabolic syndrome: causal  
791 factors, psychiatric outcomes and economic burden. *CNS Drugs*. 2008;22(8):655-69. Epub 2008/07/08.  
792 PubMed PMID: 18601304.
- 793 30. Mitchell JE, Mackenzie TB. Cardiac effects of lithium therapy in man: a review. *J Clin Psychiatry*.  
794 1982;43(2):47-51. Epub 1982/02/01. PubMed PMID: 7056703.
- 795 31. Glassman AH, Bigger JT, Jr. Antipsychotic drugs: prolonged QTc interval, torsade de pointes, and  
796 sudden death. *Am J Psychiatry*. 2001;158(11):1774-82. Epub 2001/11/03. PubMed PMID: 11691681.
- 797 32. Morriss R, Mohammed FA. Metabolism, lifestyle and bipolar affective disorder. *J Psychopharmacol*.  
798 2005;19(6 Suppl):94-101. Epub 2005/11/11. doi: 10.1177/0269881105058678. PubMed PMID: 16280342.
- 799 33. Angst F, Stassen HH, Clayton PJ, Angst J. Mortality of patients with mood disorders: follow-up over 34-  
800 38 years. *J Affect Disord*. 2002;68(2-3):167-81. Epub 2002/06/14. doi: S0165032701003779 [pii]. PubMed  
801 PMID: 12063145.
- 802 34. Ryan MC, Thakore JH. Physical consequences of schizophrenia and its treatment: the metabolic  
803 syndrome. *Life Sci*. 2002;71(3):239-57. Epub 2002/05/30. doi: S0024320502016466 [pii]. PubMed PMID:  
804 12034344.
- 805 35. Lieberman JA, Stroup TS, McEvoy JP, Swartz MS, Rosenheck RA, Perkins DO, et al. Effectiveness of  
806 antipsychotic drugs in patients with chronic schizophrenia. *N Engl J Med*. 2005;353(12):1209-23. Epub  
807 2005/09/21. doi: NEJMoa051688 [pii]  
808 10.1056/NEJMoa051688. PubMed PMID: 16172203.
- 809 36. Elmer PJ, Obarzanek E, Vollmer WM, Simons-Morton D, Stevens VJ, Young DR, et al. Effects of  
810 comprehensive lifestyle modification on diet, weight, physical fitness, and blood pressure control: 18-month  
811 results of a randomized trial. *Ann Intern Med*. 2006;144(7):485-95. Epub 2006/04/06. PubMed PMID:  
812 16585662.

- 813 37. Whelton PK, Appel LJ, Espeland MA, Applegate WB, Ettinger WH, Jr., Kostis JB, et al. Sodium  
814 reduction and weight loss in the treatment of hypertension in older persons: a randomized controlled trial of  
815 nonpharmacologic interventions in the elderly (TONE). TONE Collaborative Research Group. *JAMA*.  
816 1998;279(11):839-46. Epub 1998/03/27. PubMed PMID: 9515998.
- 817 38. Daumit GL, Dickerson FB, Wang NY, Dalcin A, Jerome GJ, Anderson CA, et al. A behavioral weight-  
818 loss intervention in persons with serious mental illness. *N Engl J Med*. 2013;368(17):1594-602. Epub  
819 2013/03/23. doi: 10.1056/NEJMoa1214530. PubMed PMID: 23517118.
- 820 39. Pylvanen V, Knip M, Pakarinen A, Kotila M, Turkka J, Isojarvi JI. Serum insulin and leptin levels in  
821 valproate-associated obesity. *Epilepsia*. 2002;43(5):514-7. Epub 2002/05/25. PubMed PMID: 12027912.
- 822 40. Sachs G, Bowden C, Calabrese JR, Ketter T, Thompson T, White R, et al. Effects of lamotrigine and  
823 lithium on body weight during maintenance treatment of bipolar I disorder. *Bipolar Disord*. 2006;8(2):175-81.  
824 Epub 2006/03/18. doi: 10.1111/j.1399-5618.2006.00308.x. PubMed PMID: 16542188.
- 825 41. Allison DB, Mentore JL, Heo M, Chandler LP, Cappelleri JC, Infante MC, et al. Antipsychotic-induced  
826 weight gain: a comprehensive research synthesis. *Am J Psychiatry*. 1999;156(11):1686-96. Epub 1999/11/30.  
827 PubMed PMID: 10553730.
- 828 42. Komossa K, Rummel-Kluge C, Schmid F, Hunger H, Schwarz S, El-Sayeh HG, et al. Aripiprazole  
829 versus other atypical antipsychotics for schizophrenia. *Cochrane Database Syst Rev*. 2009(4):CD006569.  
830 Epub 2009/10/13. doi: 10.1002/14651858.CD006569.pub3. PubMed PMID: 19821375.
- 831 43. Patel JK, Buckley PF, Woolson S, Hamer RM, McEvoy JP, Perkins DO, et al. Metabolic profiles of  
832 second-generation antipsychotics in early psychosis: findings from the CAFE study. *Schizophr Res*.  
833 2009;111(1-3):9-16. Epub 2009/04/29. doi: 10.1016/j.schres.2009.03.025. PubMed PMID: 19398192.
- 834 44. Hemmes M AD, Gerhard G, McCarty C, Nakasato C, Pawloski P, Rukstalis M, Schmelzer J, Yale S,  
835 Davis R. PS1-18: A Feasibility Pilot to Determine the Practicality of Using the HMO Research Network to  
836 Research the Genetics of Drug-Induced Serious Adverse Events. *Clin Med Res*. 2011;9(3-4):2.
- 837 45. O'Connor P. Opportunities to increase the effectiveness of EHR-based diabetes clinical decision  
838 support. *Appl Clin Inf*. 2011;2:350-4.
- 839 46. Sittig DF, Wright A, Osheroff JA, Middleton B, Teich JM, Ash JS, et al. Grand challenges in clinical  
840 decision support. *J Biomed Inform*. 2008;41(2):387-92. Epub 2007/11/22. doi: S1532-0464(07)00104-9 [pii]  
841 10.1016/j.jbi.2007.09.003. PubMed PMID: 18029232; PubMed Central PMCID: PMC2660274.
- 842 47. O'Connor PJ, Sperl-Hillen JM, Rush WA, Johnson PE, Amundson GH, Asche SE, et al. Impact of  
843 electronic health record clinical decision support on diabetes care: a randomized trial. *Ann Fam Med*.  
844 2011;9(1):12-21. Epub 2011/01/19. doi: 10.1370/afm.1196. PubMed PMID: 21242556; PubMed Central  
845 PMCID: PMC3022040.
- 846 48. Leibson C, Owens T, O'Brien P, Waring S, Tangalos E, Hanson V, et al. Use of physician and acute  
847 care services by persons with and without Alzheimer's disease: a population-based comparison. *J Am Geriatr*  
848 *Soc*. 1999;47(7):864-9. Epub 1999/07/15. PubMed PMID: 10404933.
- 849 49. O'Bryant SE HJ, Waring SC, Humphreys JD, Schiffer RB. The Relationship Between Cardiovascular  
850 Disease and Alzheimer's Disease. *Texas Public Health Journal*. 2008;60(3):3.
- 851 50. O'Bryant SE, Waring SC, Cullum CM, Hall J, Lacritz L, Massman PJ, et al. Staging dementia using  
852 Clinical Dementia Rating Scale Sum of Boxes scores: a Texas Alzheimer's research consortium study. *Arch*  
853 *Neurol*. 2008;65(8):1091-5. Epub 2008/08/13. doi: 10.1001/archneur.65.8.1091. PubMed PMID: 18695059;  
854 PubMed Central PMCID: PMC3409562.
- 855 51. Rummans TA, Smith GE, Lin SC, Waring SC, Kokmen E. Comorbidity of dementia and psychiatric  
856 disorders in older persons. *Am J Geriatr Psychiatry*. 1997;5(3):261-7. Epub 1997/07/01. PubMed PMID:  
857 9209569.
- 858 52. Waring SC, Doody RS, Pavlik VN, Massman PJ, Chan W. Survival among patients with dementia from  
859 a large multi-ethnic population. *Alzheimer Dis Assoc Disord*. 2005;19(4):178-83. Epub 2005/12/06. PubMed  
860 PMID: 16327343.
- 861 53. Bryant MD, Schoenberg ED, Johnson TV, Goodman M, Owen-Smith A, Master VA. Multimedia version  
862 of a standard medical questionnaire improves patient understanding across all literacy levels. *J Urol*.  
863 2009;182(3):1120-5. Epub 2009/07/25. doi: 10.1016/j.juro.2009.05.027. PubMed PMID: 19625036.
- 864 54. Johnson TV, Abbasi A, Ehrlich SS, Kleris RS, Chirumamilla SL, Schoenberg ED, et al. Major  
865 depression drives severity of American Urological Association Symptom Index. *Urology*. 2010;76(6):1317-20.  
866 Epub 2010/12/07. doi: 10.1016/j.urology.2010.01.069. PubMed PMID: 21130246.

- 867 55. Master VA, Johnson TV, Abbasi A, Ehrlich SS, Kleris RS, Abbasi S, et al. Poorly numerate patients in  
868 an inner city hospital misunderstand the American Urological Association symptom score. *Urology*.  
869 2010;75(1):148-52. Epub 2009/10/13. doi: 10.1016/j.urology.2009.06.060. PubMed PMID: 19819537.
- 870 56. Johnson TV, Abbasi A, Ehrlich SS, Kleris RS, Owen-Smith A, Raison CL, et al. IPSS quality of life  
871 question: a possible indicator of depression among patients with lower urinary tract symptoms. *The Canadian*  
872 *journal of urology*. 2012;19(1):6100-4. Epub 2012/02/10. PubMed PMID: 22316511.
- 873 57. Filion KB, Steffen LM, Duval S, Jacobs DR, Jr., Blackburn H, Luepker RV. Trends in smoking among  
874 adults from 1980 to 2009: the Minnesota heart survey. *Am J Public Health*. 2012;102(4):705-13. Epub  
875 2011/08/20. doi: 10.2105/AJPH.2011.300162. PubMed PMID: 21852651.
- 876 58. Luepker RV, Steffen LM, Jacobs DR, Jr., Zhou X, Blackburn H. Trends in blood pressure and  
877 hypertension detection, treatment, and control 1980 to 2009: the Minnesota Heart Survey. *Circulation*.  
878 2012;126(15):1852-7. Epub 2012/09/11. doi: 10.1161/CIRCULATIONAHA.112.098517. PubMed PMID:  
879 22962433; PubMed Central PMCID: PMC3482957.
- 880 59. McGovern PG, Pankow JS, Shahar E, Doliszny KM, Folsom AR, Blackburn H, et al. Recent trends in  
881 acute coronary heart disease--mortality, morbidity, medical care, and risk factors. *The Minnesota Heart Survey*  
882 *Investigators*. *N Engl J Med*. 1996;334(14):884-90. Epub 1996/04/04. doi: 10.1056/NEJM199604043341403.  
883 PubMed PMID: 8596571.
- 884 60. Druss BG, Rohrbaugh RM, Levinson CM, Rosenheck RA. Integrated medical care for patients with  
885 serious psychiatric illness: a randomized trial. *Arch Gen Psychiatry*. 2001;58(9):861-8. Epub 2001/09/26. doi:  
886 yoa20292 [pii]. PubMed PMID: 11545670.
- 887 61. Druss BG, von Esenwein SA. Improving general medical care for persons with mental and addictive  
888 disorders: systematic review. *Gen Hosp Psychiatry*. 2006;28(2):145-53. Epub 2006/03/07. doi:  
889 10.1016/j.genhosppsy.2005.10.006. PubMed PMID: 16516065.
- 890 62. Simon GE. Depression in medical patients. *J Gen Intern Med*. 1988;3(2):208. Epub 1988/03/01.  
891 PubMed PMID: 3258635.
- 892 63. Simon GE, Katon WJ, Lin EH, Ludman E, VonKorff M, Ciechanowski P, et al. Diabetes complications  
893 and depression as predictors of health service costs. *Gen Hosp Psychiatry*. 2005;27(5):344-51. Epub  
894 2005/09/20. doi: 10.1016/j.genhosppsy.2005.04.008. PubMed PMID: 16168795.
- 895 64. Simon GE, Ludman EJ, Bauer MS, Unutzer J, Operskalski B. Long-term effectiveness and cost of a  
896 systematic care program for bipolar disorder. *Arch Gen Psychiatry*. 2006;63(5):500-8. Epub 2006/05/03. doi:  
897 10.1001/archpsyc.63.5.500. PubMed PMID: 16651507.
- 898 65. Simon GE, VonKorff M, Barlow W. Health care costs of primary care patients with recognized  
899 depression. *Arch Gen Psychiatry*. 1995;52(10):850-6. Epub 1995/10/01. PubMed PMID: 7575105.
- 900 66. Simon GE, VonKorff M, Heiligenstein JH, Revicki DA, Grothaus L, Katon W, et al. Initial antidepressant  
901 choice in primary care. Effectiveness and cost of fluoxetine vs tricyclic antidepressants. *JAMA*.  
902 1996;275(24):1897-902. Epub 1996/06/26. PubMed PMID: 8648870.
- 903 67. O'Connor PJ, Desai JR, Butler JC, Kharbanda EO, Sperl-Hillen JM. Current status and future prospects  
904 for electronic point-of-care clinical decision support in diabetes care. *Current diabetes reports*. 2013;13(2):172-  
905 6. Epub 2012/12/12. doi: 10.1007/s11892-012-0350-z. PubMed PMID: 23225213; PubMed Central PMCID:  
906 PMC3595375.
- 907 68. D'Agostino RB, Sr., Vasan RS, Pencina MJ, Wolf PA, Cobain M, Massaro JM, et al. General  
908 cardiovascular risk profile for use in primary care: the Framingham Heart Study. *Circulation*. 2008;117(6):743-  
909 53. Epub 2008/01/24. doi: 10.1161/CIRCULATIONAHA.107.699579. PubMed PMID: 18212285.
- 910 69. Wilson PW, D'Agostino RB, Levy D, Belanger AM, Silbershatz H, Kannel WB. Prediction of coronary  
911 heart disease using risk factor categories. *Circulation*. 1998;97(18):1837-47. Epub 1998/05/29. PubMed PMID:  
912 9603539.
- 913 70. Vijan S, Hayward RA. Treatment of hypertension in type 2 diabetes mellitus: blood pressure goals,  
914 choice of agents, and setting priorities in diabetes care. *Ann Intern Med*. 2003;138(7):593-602. Epub  
915 2003/04/02. doi: 200304010-00018 [pii]. PubMed PMID: 12667032.
- 916 71. Bennett WL, Maruthur NM, Singh S, Segal JB, Wilson LM, Chatterjee R, et al. Comparative  
917 effectiveness and safety of medications for type 2 diabetes: an update including new drugs and 2-drug  
918 combinations. *Ann Intern Med*. 2011;154(9):602-13. Epub 2011/03/16. doi: 10.7326/0003-4819-154-9-  
919 201105030-00336. PubMed PMID: 21403054.

- 920 72. ICSI. Diabetes Mellitus in Adults, Type 2; Diagnosis and Management of (Guideline). 2008 [April 18,  
921 2012]. Available from:  
922 [http://www.icsi.org/guidelines\\_and\\_more/gl\\_os\\_prot/other\\_health\\_care\\_conditions/diabetes\\_mellitus\\_\\_type\\_2/  
923 diabetes\\_mellitus\\_\\_type\\_2\\_\\_management\\_of\\_\\_6.html](http://www.icsi.org/guidelines_and_more/gl_os_prot/other_health_care_conditions/diabetes_mellitus__type_2/diabetes_mellitus__type_2__management_of__6.html).
- 924 73. O'Connor PJ, Sperl-Hillen, J. Treatment of Type 2 Diabetes. Online Point of Care clinical decision  
925 support tool marketed as part of BMJ Point of Care. Concise and practical information on etiology,  
926 epidemiology, and clinical management of type 2 diabetes. BMJ. 2008.
- 927 74. Third Report of the National Cholesterol Education Program (NCEP) Expert Panel on Detection,  
928 Evaluation, and Treatment of High Blood Cholesterol in Adults (Adult Treatment Panel III) final report.  
929 Circulation. 2002;106(25):3143-421. Epub 2002/12/18. PubMed PMID: 12485966.
- 930 75. Chobanian AV, Bakris GL, Black HR, Cushman WC, Green LA, Izzo JL, Jr., et al. The Seventh Report  
931 of the Joint National Committee on Prevention, Detection, Evaluation, and Treatment of High Blood Pressure:  
932 the JNC 7 report. JAMA. 2003;289(19):2560-72. Epub 2003/05/16. doi: 10.1001/jama.289.19.2560. PubMed  
933 PMID: 12748199.
- 934 76. Summary of revisions for the 2009 Clinical Practice Recommendations. Diabetes Care. 2009;32 Suppl  
935 1:S3-5. Epub 2009/01/06. doi: 10.2337/dc09-S003. PubMed PMID: 19118287; PubMed Central PMCID:  
936 PMC2613585.
- 937 77. ICSI. Chronic Disease Risk Factors, Primary Prevention of (Guideline): ICSI (Institute for Chronic  
938 Systems Improvement). 2008.
- 939 78. O'Connor PJ, Quiter ES, Rush WA, Wiest M, Meland JT, Ryu S. Impact of hypertension guideline  
940 implementation on blood pressure control and drug use in primary care clinics. Jt Comm J Qual Improv.  
941 1999;25(2):68-77. Epub 1999/02/23. PubMed PMID: 10027112.
- 942 79. Hypertension Diagnosis and Treatment (Guideline). [Internet]. November 2008 [cited May 29, 2011.].  
943 Available from:  
944 [http://www.icsi.org/guidelines\\_and\\_more/gl\\_os\\_prot/cardiovascular/hypertension\\_4/hypertension\\_diagnosis\\_a  
945 nd\\_treatment\\_\\_11.html](http://www.icsi.org/guidelines_and_more/gl_os_prot/cardiovascular/hypertension_4/hypertension_diagnosis_and_treatment__11.html).
- 946 80. 2008 PHS Guideline Update Panel L, and Staff. Treating tobacco use and dependence: 2008 update  
947 U.S.Public Health Service Clinical Practice Guideline executive summary. Respir Care. 2008;53(9):6. PubMed  
948 Central PMCID: PMC18807274.
- 949 81. O'Connor PJ, Sperl-Hillen JM, Johnson PE, Rush WA, Asche SE, Dutta P, et al. Simulated physician  
950 learning intervention to improve safety and quality of diabetes care: a randomized trial. Diabetes Care.  
951 2009;32(4):585-90. Epub 2009/01/28. doi: dc08-0944 [pii]  
952 10.2337/dc08-0944. PubMed PMID: 19171723; PubMed Central PMCID: PMC2660457.
- 953 82. O'Connor PJ, Sperl-Hillen JM, Johnson PE, Rush WA, Biltz G. Clinical Inertia and Outpatient Medical  
954 Errors. In: Henriksen KB, J.; Lewin, D.; Marks, E., editor. Advances in Patient Safety: From Research to  
955 Implementation. Rockville, MD: Agency for Healthcare Research and Quality (AHRQ); 2005. p. 293-308.
- 956 83. O'Connor PJ, Sperl-Hillen JM, Johnson PE, Rush WA. Identification, Classification, and Frequency of  
957 Medical Errors in Outpatient Diabetes Care. In: Henriksen KB, J.; Lewin, D.; Marks, E., editor. Advances in  
958 Patient Safety: From Research to Implementation. Rockville, MD2005. p. 369-80.
- 959 84. Tsoi DT, Porwal M, Webster AC. Interventions for smoking cessation and reduction in individuals with  
960 schizophrenia. Cochrane Database Syst Rev. 2013;2:CD007253. Epub 2013/03/02. doi:  
961 10.1002/14651858.CD007253.pub3. PubMed PMID: 23450574.
- 962 85. Wilson PW. Risk scores for prediction of coronary heart disease: an update. Endocrinol Metab Clin  
963 North Am. 2009;38(1):33-44. Epub 2009/02/17. doi: 10.1016/j.ecl.2008.11.001. PubMed PMID: 19217511.
- 964 86. Wilson PW, Castelli WP, Kannel WB. Coronary risk prediction in adults (the Framingham Heart Study).  
965 Am J Cardiol. 1987;59(14):91G-4G. Epub 1987/05/29. PubMed PMID: 3591674.
- 966 87. Powell LH, Calvin JE, Jr., Mendes de Leon CF, Richardson D, Grady KL, Flynn KJ, et al. The Heart  
967 Failure Adherence and Retention Trial (HART): design and rationale. Am Heart J. 2008;156(3):452-60. Epub  
968 2008/09/02. doi: 10.1016/j.ahj.2008.05.011. PubMed PMID: 18760125; PubMed Central PMCID:  
969 PMC3609705.
- 970 88. van der Wal MH, Jaarsma T. Adherence in heart failure in the elderly: problem and possible solutions.  
971 Int J Cardiol. 2008;125(2):203-8. Epub 2007/11/23. doi: 10.1016/j.ijcard.2007.10.011. PubMed PMID:  
972 18031843.

- 973 89. Flynn KJ, Powell LH, Mendes de Leon CF, Munoz R, Eaton CB, Downs DL, et al. Increasing self-  
974 management skills in heart failure patients: a pilot study. *Congest Heart Fail.* 2005;11(6):297-302. Epub  
975 2005/12/07. PubMed PMID: 16330904.
- 976 90. Baker DW, Williams MV, Parker RM, Gazmararian JA, Nurss J. Development of a brief test to measure  
977 functional health literacy. *Patient Educ Couns.* 1999;38(1):33-42. Epub 2003/10/08. doi: S0738-  
978 3991(98)00116-5 [pii]. PubMed PMID: 14528569.
- 979 91. Paulos JA. *Innumeracy: Mathematical Illiteracy and Its Consequences.* . New York: Hill and Wang;  
980 2001.
- 981 92. Boyle RG, O'Connor PJ, Pronk NP, Tan A. Stages of change for physical activity, diet, and smoking  
982 among HMO members with chronic conditions. *Am J Health Promot.* 1998;12(3):170-5. Epub 1997/12/08.  
983 PubMed PMID: 10176091.
- 984 93. Peterson KA, Hughes M. Readiness to change and clinical success in a diabetes educational program.  
985 *J Am Board Fam Pract.* 2002;15(4):266-71. Epub 2002/08/02. PubMed PMID: 12150458.
- 986 94. O'Connor PJ, Asche SE, Crain AL, Rush WA, Whitebird RR, Solberg LI, et al. Is patient readiness to  
987 change a predictor of improved glycemic control? *Diabetes Care.* 2004;27(10):2325-9. Epub 2004/09/29. doi:  
988 27/10/2325 [pii]. PubMed PMID: 15451895.
- 989 95. Prochaska JO, Velicer WF, Rossi JS, Goldstein MG, Marcus BH, Rakowski W, et al. Stages of change  
990 and decisional balance for 12 problem behaviors. *Health Psychol.* 1994;13(1):39-46. Epub 1994/01/01.  
991 PubMed PMID: 8168470.
- 992 96. Ruggiero L, Rossi JS, Prochaska JO, Glasgow RE, de Groot M, Dryfoos JM, et al. Smoking and  
993 diabetes: readiness for change and provider advice. *Addict Behav.* 1999;24(4):573-8. Epub 1999/08/31. doi:  
994 S0306-4603(98)00086-0 [pii]. PubMed PMID: 10466853.
- 995 97. Ruggiero LP, J.O. Readiness for change: application of the transtheoretical model to diabetes. .  
996 *Diabetes Spectrum.* 1993;6(1):21-60.
- 997 98. Katon W, Guico-Pabia CJ. Improving quality of depression care using organized systems of care: a  
998 review of the literature. *The primary care companion to CNS disorders.* 2011;13(1). Epub 2011/07/07. doi:  
999 10.4088/PCC.10r01019blu. PubMed PMID: 21731829; PubMed Central PMCID: PMC3121215.
- 000 99. Druss BG, von Esenwein SA, Compton MT, Rask KJ, Zhao L, Parker RM. A randomized trial of medical  
001 care management for community mental health settings: the Primary Care Access, Referral, and Evaluation  
002 (PCARE) study. *Am J Psychiatry.* 2010;167(2):151-9. Epub 2009/12/17. doi: 10.1176/appi.ajp.2009.09050691.  
003 PubMed PMID: 20008945.
- 004 100. Rubenstein LV, Chaney EF, Ober S, Felker B, Sherman SE, Lanto A, et al. Using evidence-based  
005 quality improvement methods for translating depression collaborative care research into practice. *Families,*  
006 *systems & health : the journal of collaborative family healthcare.* 2010;28(2):91-113. Epub 2010/08/11. doi:  
007 10.1037/a0020302. PubMed PMID: 20695669.
- 008 101. O'Connor PJ, Sperl-Hillen J. Clinical and public health implications of glycemic relapse in type 2  
009 diabetes. *Nat Clin Pract Endocrinol Metab.* 2007;3(1):10-1. Epub 2006/12/21. doi: 10.1038/ncpendmet0354.  
010 PubMed PMID: 17179924.
- 011 102. Lloyd-Jones DM, Wilson PW, Larson MG, Beiser A, Leip EP, D'Agostino RB, et al. Framingham risk  
012 score and prediction of lifetime risk for coronary heart disease. *Am J Cardiol.* 2004;94(1):20-4. Epub  
013 2004/06/29. doi: 10.1016/j.amjcard.2004.03.023. PubMed PMID: 15219502.
- 014 103. Snijders TAB, R.J. Standard errors and sample sizes in two-level research. . *Journal of Educational*  
015 *Statistics.* 1993;18(3):237-60.
- 016 104. Little RJAR, D.B. *Statistical Analysis with Missing Data.* New York: Wiley.; 1987.
- 017 105. Rubin DB. *Multiple Imputation for Nonresponse in Surveys.* New York: Wiley; 1987.
- 018 106. Andridge RR. Quantifying the impact of fixed effects modeling of clusters in multiple imputation for  
019 cluster randomized trials. *Biom J.* 2011;53(1):57-74. Epub 2011/01/25. doi: 10.1002/bimj.201000140. PubMed  
020 PMID: 21259309; PubMed Central PMCID: PMC3124925.
- 021 107. Sobel ME. Asymptotic intervals for indirect effects in structural equation models. In: Leinhardt, editor.  
022 *Sociological Methodology.* San Francisco: Jossey-Bass  
023 1982. p. 290-312.
- 024 108. Mackinnon DP, Warsi G, Dwyer JH. A Simulation Study of Mediated Effect Measures. *Multivariate*  
025 *Behav Res.* 1995;30(1):41. Epub 1995/01/01. doi: 10.1207/s15327906mbr3001\_3. PubMed PMID: 20157641;  
026 PubMed Central PMCID: PMC2821114.

- 027 109. MacKinnon DP, Lockwood CM, Hoffman JM, West SG, Sheets V. A comparison of methods to test  
028 mediation and other intervening variable effects. *Psychol Methods*. 2002;7(1):83-104. Epub 2002/04/04.  
029 PubMed PMID: 11928892; PubMed Central PMCID: PMC2819363.
- 030 110. MacKinnon DP. *Introduction to Statistical Mediation Analysis*. New York: Erlbaum; 2008.
- 031 111. Stevens RJ, Kothari V, Adler AI, Stratton IM. The UKPDS risk engine: a model for the risk of coronary  
032 heart disease in Type II diabetes (UKPDS 56). *Clin Sci (Lond)*. 2001;101(6):671-9. Epub 2001/11/29. PubMed  
033 PMID: 11724655.
- 034 112. Aspirin for the prevention of cardiovascular disease: U.S. Preventive Services Task Force  
035 recommendation statement. *Ann Intern Med*. 2009;150(6):396-404. Epub 2009/03/19. doi: 150/6/396 [pii].  
036 PubMed PMID: 19293072.
- 037 113. O'Connor PJ, Sperl-Hillen J, Johnson PE, Rush WA, Crain AL. Customized feedback to patients and  
038 providers failed to improve safety or quality of diabetes care: a randomized trial. *Diabetes Care*.  
039 2009;32(7):1158-63. Epub 2009/04/16. doi: dc08-2247 [pii]  
040 10.2337/dc08-2247. PubMed PMID: 19366977; PubMed Central PMCID: PMC2699722.
- 041 114. O'Connor PJ, Rush WA, Prochaska JO, Pronk NP, Boyle RG. Professional advice and readiness to  
042 change behavioral risk factors among members of a managed care organization. *Am J Manag Care*.  
043 2001;7(2):125-30. Epub 2001/02/24. doi: 651 [pii]. PubMed PMID: 11216330.
- 044 115. Greenfield S, Kaplan SH, Ware JE, Jr., Yano EM, Frank HJ. Patients' participation in medical care:  
045 effects on blood sugar control and quality of life in diabetes. *J Gen Intern Med*. 1988;3(5):448-57. Epub  
046 1988/09/01. PubMed PMID: 3049968.
- 047 116. Wing RR. Long-term effects of a lifestyle intervention on weight and cardiovascular risk factors in  
048 individuals with type 2 diabetes mellitus: four-year results of the Look AHEAD trial. *Arch Intern Med*.  
049 2010;170(17):1566-75. Epub 2010/09/30. doi: 170/17/1566 [pii]  
050 10.1001/archinternmed.2010.334. PubMed PMID: 20876408; PubMed Central PMCID: PMC3084497.
- 051 117. Epstein LH, Wing RR, Penner BC, Kress MJ. Effect of diet and controlled exercise on weight loss in  
052 obese children. *J Pediatr*. 1985;107(3):358-61. Epub 1985/09/01. PubMed PMID: 4032130.
- 053 118. Li G, Zhang P, Wang J, Gregg EW, Yang W, Gong Q, et al. The long-term effect of lifestyle  
054 interventions to prevent diabetes in the China Da Qing Diabetes Prevention Study: a 20-year follow-up study.  
055 *Lancet*. 2008;371(9626):1783-9. Epub 2008/05/27. doi: S0140-6736(08)60766-7 [pii]  
056 10.1016/S0140-6736(08)60766-7. PubMed PMID: 18502303.
- 057 119. Lindstrom J, Ilanne-Parikka P, Peltonen M, Aunola S, Eriksson JG, Hemio K, et al. Sustained reduction  
058 in the incidence of type 2 diabetes by lifestyle intervention: follow-up of the Finnish Diabetes Prevention Study.  
059 *Lancet*. 2006;368(9548):1673-9. Epub 2006/11/14. doi: S0140-6736(06)69701-8 [pii]  
060 10.1016/S0140-6736(06)69701-8. PubMed PMID: 17098085.
- 061 120. Knowler WC, Fowler SE, Hamman RF, Christophi CA, Hoffman HJ, Brenneman AT, et al. 10-year  
062 follow-up of diabetes incidence and weight loss in the Diabetes Prevention Program Outcomes Study. *Lancet*.  
063 2009;374(9702):1677-86. Epub 2009/11/03. doi: S0140-6736(09)61457-4 [pii]  
064 10.1016/S0140-6736(09)61457-4. PubMed PMID: 19878986; PubMed Central PMCID: PMC3135022.
- 065 121. O'Connor PJ. Electronic medical records and diabetes care improvement: Are we waiting for Godot?  
066 *Diabetes Care*. 2003;26(3):942-3. PubMed PMID: 12610062.
- 067 122. Meigs JB, Cagliero E, Dubey A, Murphy-Sheehy P, Gildesgame C, Chueh H, et al. A controlled trial of  
068 web-based diabetes disease management: the MGH diabetes primary care improvement project. *Diabetes*  
069 *Care*. 2003;26(3):750-7.
- 070 123. Montori VM, Dinneen SF, Gorman CA, Zimmerman BR, Rizza RA, Bjornsen SS, et al. The impact of  
071 planned care and a diabetes electronic management system on community-based diabetes care: the Mayo  
072 Health System Diabetes Translation Project. *Diabetes Care*. 2002;25(11):1952-7. PubMed PMID: 12401738.
- 073 124. Tierney WM, Overhage JM, Murray MD, Harris LE, Zhou XH, Eckert GJ, et al. Effects of computerized  
074 guidelines for managing heart disease in primary care. *J Gen Intern Med*. 2003;18(12):967-76. PubMed PMID:  
075 14687254.
- 076 125. Murray MD, Harris LE, Overhage JM, Zhou XH, Eckert GJ, Smith FE, et al. Failure of computerized  
077 treatment suggestions to improve health outcomes of outpatients with uncomplicated hypertension: results of a  
078 randomized controlled trial. *Pharmacotherapy*. 2004;24(3):324-37. PubMed PMID: 15040645.

079 126. Lobach DS, G.D; Bright, T.J.; Wong, A.; Dhurjati, R.; Bristow, E.; Bastian, L.; Coeytaux, R.; Samsa,  
080 G.;Hasselblad, V.; Williams, J.W.; Wing, L.; Musty, M.I; Kendrick, A.S. Enabling Health Care Decisionmaking  
081 Through Clinical Decision Support and Knowledge  
082 Management. Evidence Report No. 203. Rockville, MD: AHRQ Publication No. 12-E001-EF. ; April 2012.
