# Supplementary material for: Effect of Clinical Decision Support on Cardiovascular Risk Among Adults With Bipolar Disorder, Schizoaffective Disorder, or Schizophrenia: A Cluster Randomized Clinical Trial
Source: PubMed Central journal article supplement (PMC8902652; doi:10.1001/jamanetworkopen.2022.0202), 2022-03-07
Supplement: jamanetwopen-e220202-s002.pdf [file jamanetwopen-e220202-s002.pdf]

## Supplementary Online Content

Rossom RC, Crain AL, O'Connor PJ, et al. Effect of clinical decision support on cardiovascular risk among adults with bipolar disorder, schizoaffective disorder, or schizophrenia: a cluster randomized clinical trial. *JAMA Netw Open*. 2022;5(3):e220202. doi:10.1001/jamanetworkopen.2022.0202

**eTable 1.** Serious Mental Illness (SMI) Diagnostic Codes

**eTable 2.** Potentially Obesogenic Medications for Serious Mental Illness (SMI)

**eTable 3.** Intervention Dose, ie, the Number and Percent of Visits (Index and Post-Index) at Which the CDS Was Printed by System and Treatment Group

**eTable 4.** Rate Ratios Estimating Rates of Change in Total Modifiable CV Risk From Index to 12 Months Post-Index Among Patients in Intervention Clinics by Print Rate Subgroups

**eTable 5.** Emergency Department Visit Rates by Health System and Treatment Group in the Year Prior to the First Visit (Pre) and Time Between First Visit and 9/19/2018 (Post)

**eTable 6.** Inpatient Stay Rates by Health System and Treatment Group in the Year Prior to the First Visit (Pre) and Time Between First Visit and 9/19/2018 (Post)

**eTable 7.** Suicide Attempt Rates by Health System and Treatment Group in the Year Prior to the First Visit (Pre) and Time Between First Visit and 9/19/2018 (Post)

This supplementary material has been provided by the authors to give readers additional information about their work.

| <b>eTable 1. Serious Mental Illness (SMI) Diagnostic Codes</b> |                                                              |                     |
|----------------------------------------------------------------|--------------------------------------------------------------|---------------------|
|                                                                | <b>ICD-9 codes</b>                                           | <b>ICD-10 codes</b> |
| <b>Bipolar disorder</b>                                        | 296.00-296.89, 301.11                                        | F30.1-F31.9         |
| <b>Schizophrenia</b>                                           | 295.0-295.6, 295.8-295.9, 297.1, 297.3, 298.8, 298.9, 301.22 | F20.0-F24, F28-F29  |
| <b>Schizoaffective disorder</b>                                | 295.6                                                        | F25.0-F25.9         |

| <b>eTable 2. Potentially Obesogenic Medications for Serious Mental Illness (SMI)</b> |             |               |             |                 |
|--------------------------------------------------------------------------------------|-------------|---------------|-------------|-----------------|
| Amitriptyline                                                                        | Clozapine   | Mirtazapine   | Phenelzine  | Thioridazine    |
| Asenapine                                                                            | Desipramine | Nortriptyline | Quetiapine  | Tranlycypromine |
| Chlorpromazine                                                                       | Doxepin     | Olanzapine    | Risperidone |                 |
| Clomipramine                                                                         | Imipramine  | Paroxetine    | Selegiline  |                 |

Identified in consultation with clinic leadership and informed by a literature search. Mood-stabilizing medications were not included, as study team members and clinic leaders were unable to identify suitable non-obesogenic alternatives.

| <b>eTable 3. Intervention Dose, ie, the Number and Percent of Visits (Index and Post-Index) at Which the CDS Was Printed by System and Treatment Group</b> |                |            |                |            |                |            |                |            |
|------------------------------------------------------------------------------------------------------------------------------------------------------------|----------------|------------|----------------|------------|----------------|------------|----------------|------------|
|                                                                                                                                                            | <b>All</b>     |            | <b>Site A</b>  |            | <b>Site B</b>  |            | <b>Site C</b>  |            |
|                                                                                                                                                            | <b>Control</b> | <b>CDS</b> | <b>Control</b> | <b>CDS</b> | <b>Control</b> | <b>CDS</b> | <b>Control</b> | <b>CDS</b> |
| <b>n</b>                                                                                                                                                   | 4387           | 4550       | 2120           | 1807       | 1486           | 1818       | 781            | 925        |
| <b>visits, n</b>                                                                                                                                           |                |            |                |            |                |            |                |            |
| <b>M</b>                                                                                                                                                   | 6.8            | 6.8        | 7.4            | 7.2        | 6.7            | 7.2        | 5.0            | 5.2        |
| <b>SD</b>                                                                                                                                                  | 5.5            | 5.6        | 6.1            | 6.2        | 5.1            | 5.7        | 3.4            | 3.7        |
| <b>25<sup>th</sup> percentile</b>                                                                                                                          | 3              | 3          | 3              | 3          | 3              | 3          | 3              | 3          |
| <b>Median</b>                                                                                                                                              | 5              | 5          | 6              | 5          | 5              | 6          | 4              | 4          |
| <b>75<sup>th</sup> percentile</b>                                                                                                                          | 9              | 9          | 9              | 9          | 8              | 9          | 6              | 6          |
| <b>Visits for which CDS printed, n</b>                                                                                                                     |                |            |                |            |                |            |                |            |
| <b>M</b>                                                                                                                                                   | 0.5            | 4.0        | 0.8            | 4.3        | 0.2            | 4.1        | 0.1            | 3.1        |
| <b>SD</b>                                                                                                                                                  | 1.5            | 3.3        | 2.0            | 3.7        | 0.9            | 3.3        | 0.5            | 2.3        |
| <b>25<sup>th</sup> percentile</b>                                                                                                                          | 0              | 2          | 0              | 2          | 0              | 2          | 0              | 2          |
| <b>Median</b>                                                                                                                                              | 0              | 3          | 0              | 3          | 0              | 3          | 0              | 3          |
| <b>75<sup>th</sup> percentile</b>                                                                                                                          | 0              | 5          | 1              | 6          | 0              | 6          | 0              | 4          |
| <b>CDS printed, % of visits</b>                                                                                                                            |                |            |                |            |                |            |                |            |
| <b>M</b>                                                                                                                                                   | 5.7            | 61.1       | 9.3            | 62.1       | 2.5            | 59.5       | 2.0            | 62.2       |
| <b>SD</b>                                                                                                                                                  | 15.3           | 27.8       | 19.0           | 28.7       | 9.5            | 26.4       | 9.6            | 28.3       |
| <b>25<sup>th</sup> percentile</b>                                                                                                                          | 0              | 45.5       | 0              | 45.5       | 0              | 44.4       | 0              | 50.0       |
| <b>Median</b>                                                                                                                                              | 0              | 63.6       | 0              | 66.7       | 0              | 61.1       | 0              | 66.7       |
| <b>75<sup>th</sup> percentile</b>                                                                                                                          | 0              | 80.0       | 9.1            | 83.3       | 0              | 76.9       | 0              | 80.0       |
| <b>CDS printed, % of visits</b>                                                                                                                            |                |            |                |            |                |            |                |            |
| <b>0%</b>                                                                                                                                                  | 82.6           | 5.9        | 71.9           | 6.5        | 91.5           | 5.3        | 94.6           | 5.9        |
| <b>&gt;0 - &lt;50%</b>                                                                                                                                     | 12.6           | 20.5       | 20.0           | 19.9       | 7.1            | 22.2       | 3.1            | 18.3       |
| <b>50%- &lt;100%</b>                                                                                                                                       | 4.6            | 56.0       | 7.7            | 54.1       | 1.3            | 58.7       | 2.3            | 54.3       |
| <b>100%</b>                                                                                                                                                | 0.2            | 17.6       | 0.4            | 19.4       | 0              | 13.8       | 0              | 21.5       |

**eTable 4.** Rate Ratios Estimating Rates of Change in Total Modifiable CV Risk From Index to 12 Months Post-Index Among Patients in Intervention Clinics by Print Rate Subgroups

|                        | <b>ALL</b>         | <b>Site A</b>      | <b>Site B</b>      | <b>Site C</b>      |
|------------------------|--------------------|--------------------|--------------------|--------------------|
|                        | <b>RR (95% CI)</b> | <b>RR (95% CI)</b> | <b>RR (95% CI)</b> | <b>RR (95% CI)</b> |
| <b>Print rate</b>      |                    |                    |                    |                    |
| <b>0%</b>              | 0.99 (0.91-1.07)   | 0.93 (0.83-1.03)   | 1.24 (1.06-1.45)   | 0.83 (0.61-1.11)   |
| <b>&gt;0 - &lt;50%</b> | 0.99 (0.96-1.02)   | 1.00 (0.96-1.04)   | 0.98 (0.94-1.02)   | 1.00 (0.91-1.09)   |
| <b>50%- &lt;100%</b>   | 0.99 (0.98-1.01)   | 0.99 (0.96-1.01)   | 1.01 (0.98-1.04)   | 0.97 (0.92-1.04)   |
| <b>100%</b>            | 1.01 (0.96-1.06)   | 1.01 (0.95-1.08)   | 0.99 (0.91-1.08)   | 1.03 (0.90-1.19)   |

**eTable 5. Emergency Department Visit Rates by Health System and Treatment Group in the Year Prior to the First Visit (Pre) and Time Between First Visit and 9/19/2018 (Post)**

|                              |             | Site A      |      |      | Site B      |      |      | Site C      |      |      |
|------------------------------|-------------|-------------|------|------|-------------|------|------|-------------|------|------|
|                              |             | Control     | CDS  | All  | Control     | CDS  | All  | Control     | CDS  | All  |
| <b>n patients</b>            |             | 2120        | 1807 | 3927 | 1486        | 1818 | 3304 | 781         | 925  | 1706 |
| <b>pt years</b>              | <b>M</b>    | 2.07        | 2.07 | 2.07 | 1.42        | 1.42 | 1.42 | 1.31        | 1.32 | 1.32 |
| <b>follow-up</b>             | <b>Mdn</b>  | 2.21        | 2.21 | 2.21 | 1.48        | 1.48 | 1.48 | 1.35        | 1.36 | 1.36 |
|                              |             |             |      |      |             |      |      |             |      |      |
| <b>n ED visits</b>           | <b>pre</b>  | 2053        | 1037 | 3090 | 1933        | 1776 | 3709 | 248         | 464  | 712  |
|                              | <b>post</b> | 3873        | 2218 | 6091 | 2601        | 2316 | 4917 | 389         | 839  | 1228 |
|                              |             |             |      |      |             |      |      |             |      |      |
| <b>n per patient</b>         | <b>pre</b>  | 0.97        | 0.57 | 0.79 | 1.30        | 0.98 | 1.12 | 0.32        | 0.50 | 0.42 |
|                              | <b>post</b> | 1.83        | 1.23 | 1.55 | 1.75        | 1.27 | 1.49 | 0.50        | 0.91 | 0.72 |
|                              |             |             |      |      |             |      |      |             |      |      |
| <b>n patients with 1+</b>    | <b>pre</b>  | 762         | 395  | 1157 | 626         | 621  | 1247 | 125         | 212  | 337  |
|                              | <b>post</b> | 1008        | 576  | 1584 | 713         | 708  | 1421 | 161         | 309  | 470  |
|                              |             |             |      |      |             |      |      |             |      |      |
| <b>% of patients with 1+</b> | <b>pre</b>  | 35.9        | 21.9 | 29.5 | 42.1        | 34.2 | 37.7 | 16.0        | 22.9 | 19.8 |
|                              | <b>post</b> | 47.5        | 31.9 | 40.3 | 48.0        | 38.9 | 43.0 | 20.6        | 33.4 | 27.5 |
|                              |             |             |      |      |             |      |      |             |      |      |
|                              |             | tx, p=      |      | 0.02 | tx, p=      |      | 0.42 | tx, p=      |      | 0.12 |
|                              |             | time, p=    |      | 0.02 | time, p=    |      | 0.20 | time, p=    |      | 0.07 |
|                              |             | tx*time, p= |      | 0.40 | tx*time, p= |      | 0.80 | tx*time, p= |      | 0.20 |
|                              |             |             |      |      |             |      |      |             |      |      |
| <b>n per patient-year</b>    | <b>pre</b>  | 0.97        | 0.57 | 0.79 | 1.30        | 0.98 | 1.12 | 0.32        | 0.50 | 0.42 |
|                              | <b>post</b> | 0.88        | 0.59 | 0.75 | 1.23        | 0.90 | 1.05 | 0.38        | 0.69 | 0.55 |
|                              |             |             |      |      |             |      |      |             |      |      |
|                              |             | tx, p=      |      | 0.14 | tx, p=      |      | 0.24 | tx, p=      |      | 0.17 |
|                              |             | time, p=    |      | 0.61 | time, p=    |      | 0.16 | time, p=    |      | 0.04 |
|                              |             | tx*time, p= |      | 0.17 | tx*time, p= |      | 0.73 | tx*time, p= |      | 0.42 |

**eTable 6. Inpatient Stay Rates by Health System and Treatment Group in the Year Prior to the First Visit (Pre) and Time Between First Visit and 9/19/2018 (Post)**

|                              |             | Site A      |      |        | Site B      |      |      | Site C      |      |      |
|------------------------------|-------------|-------------|------|--------|-------------|------|------|-------------|------|------|
|                              |             | Control     | CDS  | All    | Control     | CDS  | All  | Control     | CDS  | All  |
| <b>n patients</b>            |             | 2120        | 1807 | 3927   | 1486        | 1818 | 3304 | 781         | 925  | 1706 |
| <b>pt years</b>              | <b>M</b>    | 2.07        | 2.07 | 2.07   | 1.42        | 1.42 | 1.42 | 1.31        | 1.32 | 1.32 |
| <b>follow-up</b>             | <b>Mdn</b>  | 2.21        | 2.21 | 2.21   | 1.48        | 1.48 | 1.48 | 1.35        | 1.36 | 1.36 |
|                              |             |             |      |        |             |      |      |             |      |      |
| <b>n IP stays</b>            | <b>pre</b>  | 420         | 247  | 667    | 357         | 408  | 765  | 84          | 153  | 237  |
|                              | <b>post</b> | 729         | 509  | 1238   | 593         | 600  | 1193 | 93          | 222  | 315  |
|                              |             |             |      |        |             |      |      |             |      |      |
| <b>n per patient</b>         | <b>pre</b>  | 0.20        | 0.14 | 0.17   | 0.24        | 0.22 | 0.23 | 0.11        | 0.17 | 0.14 |
|                              | <b>post</b> | 0.34        | 0.28 | 0.32   | 0.40        | 0.33 | 0.36 | 0.12        | 0.24 | 0.19 |
|                              |             |             |      |        |             |      |      |             |      |      |
| <b>n patients with 1+</b>    | <b>pre</b>  | 279         | 167  | 446    | 221         | 235  | 456  | 53          | 100  | 153  |
|                              | <b>post</b> | 383         | 259  | 642    | 287         | 313  | 600  | 64          | 130  | 194  |
|                              |             |             |      |        |             |      |      |             |      |      |
| <b>% of patients with 1+</b> | <b>pre</b>  | 13.2        | 9.2  | 11.4   | 14.9        | 12.9 | 13.8 | 6.8         | 10.8 | 9.0  |
|                              | <b>post</b> | 18.1        | 14.3 | 16.3   | 19.3        | 17.2 | 18.2 | 8.2         | 14.1 | 11.4 |
|                              |             |             |      |        |             |      |      |             |      |      |
|                              |             | tx, p=      |      | 0.09   | tx, p=      |      | 0.40 | tx, p=      |      | 0.11 |
|                              |             | time, p=    |      | 0.0002 | time, p=    |      | 0.84 | time, p=    |      | 0.88 |
|                              |             | tx*time, p= |      | 0.31   | tx*time, p= |      | 0.85 | tx*time, p= |      | 0.69 |
|                              |             |             |      |        |             |      |      |             |      |      |
| <b>n per patient-year</b>    | <b>pre</b>  | 0.20        | 0.14 | 0.17   | 0.24        | 0.22 | 0.23 | 0.11        | 0.17 | 0.14 |
|                              | <b>post</b> | 0.17        | 0.14 | 0.15   | 0.28        | 0.23 | 0.25 | 0.09        | 0.18 | 0.14 |
|                              |             |             |      |        |             |      |      |             |      |      |
|                              |             | tx, p=      |      | 0.31   | tx, p=      |      | 0.59 | tx, p=      |      | 0.09 |
|                              |             | time, p=    |      | 0.28   | time, p=    |      | 0.06 | time, p=    |      | 0.71 |
|                              |             | tx*time, p= |      | 0.16   | tx*time, p= |      | 0.16 | tx*time, p= |      | 0.25 |

**eTable 7. Suicide Attempt Rates by Health System and Treatment Group in the Year Prior to the First Visit (Pre) and Time Between First Visit and 9/19/2018 (Post)**

|                              |             | Site A           |              |       | Site B           |              |       | Site C      |             |       |
|------------------------------|-------------|------------------|--------------|-------|------------------|--------------|-------|-------------|-------------|-------|
|                              |             | Control          | CDS          | All   | Control          | CDS          | All   | Control     | CDS         | All   |
| <b>n patients</b>            |             | 2120             | 1807         | 3927  | 1486             | 1818         | 3304  | 781         | 925         | 1706  |
| <b>pt years</b>              | <b>M</b>    | 2.07             | 2.07         | 2.07  | 1.42             | 1.42         | 1.42  | 1.31        | 1.32        | 1.32  |
| <b>follow-up</b>             | <b>Mdn</b>  | 2.21             | 2.21         | 2.21  | 1.48             | 1.48         | 1.48  | 1.35        | 1.36        | 1.36  |
|                              |             |                  |              |       |                  |              |       |             |             |       |
| <b>n suicide attempts</b>    | <b>pre</b>  | 57               | 42           | 99    | 64               | 66           | 130   | 3           | 5           | 8     |
|                              | <b>post</b> | 93               | 60           | 153   | 67               | 48           | 115   | 10          | 18          | 28    |
|                              |             |                  |              |       |                  |              |       |             |             |       |
| <b>n per patient</b>         | <b>pre</b>  | 0.027            | 0.023        | 0.025 | 0.043            | 0.036        | 0.039 | 0.004       | 0.005       | 0.004 |
|                              | <b>post</b> | 0.044            | 0.033        | 0.039 | 0.045            | 0.026        | 0.035 | 0.013       | 0.019       | 0.016 |
|                              |             |                  |              |       |                  |              |       |             |             |       |
| <b>n patients with 1+</b>    | <b>pre</b>  | 49               | 33           | 82    | 33               | 30           | 63    | 3           | 5           | 8     |
| <b>suicide attempt</b>       | <b>post</b> | 69               | 48           | 117   | 41               | 27           | 68    | 8           | 5           | 13    |
|                              |             |                  |              |       |                  |              |       |             |             |       |
| <b>% of patients with 1+</b> | <b>pre</b>  | 2.3              | 1.8          | 2.1   | 2.2              | 1.7          | 1.9   | 0.4         | 0.5         | 0.5   |
| <b>suicide attempts</b>      | <b>post</b> | 3.3              | 2.7          | 3.0   | 2.8              | 1.5          | 2.1   | 1.0         | 0.5         | 0.8   |
|                              |             |                  |              |       |                  |              |       |             |             |       |
|                              |             | tx, p= 0.21      |              |       | tx, p= 0.009     |              |       |             |             |       |
|                              |             | time, p= 0.02    |              |       | time, p= 0.10    |              |       |             |             |       |
|                              |             | tx*time, p= 0.94 |              |       | tx*time, p= 0.36 |              |       |             |             |       |
|                              |             |                  |              |       |                  |              |       |             |             |       |
| <b>n per patient-year</b>    | <b>pre</b>  | 0.027            | 0.023        | 0.025 | 0.043            | 0.036        | 0.039 | .004        | .005        | .005  |
|                              | <b>post</b> | 0.021            | <b>0.016</b> | 0.019 | <b>0.032</b>     | <b>0.019</b> | 0.025 | <b>.010</b> | <b>.015</b> | .012  |
|                              |             |                  |              |       |                  |              |       |             |             |       |
|                              |             | tx, p= 0.44      |              |       | tx, p= 0.22      |              |       |             |             |       |
|                              |             | time, p= 0.05    |              |       | time, p= 0.09    |              |       |             |             |       |
|                              |             | tx*time, p= 0.61 |              |       | tx*time, p= 0.41 |              |       |             |             |       |
