# Supplementary material for: Effect of Clinical Decision Support on Cardiovascular Risk Among Adults With Bipolar Disorder, Schizoaffective Disorder, or Schizophrenia: A Cluster Randomized Clinical Trial
Source: PubMed Central journal article supplement (PMC8902652; doi:10.1001/jamanetworkopen.2022.0202), 2022-03-07
Supplement: jamanetwopen-e220202-s003.pdf [file jamanetwopen-e220202-s003.pdf]

## Data Sharing Statement

Rossom. Effect of Clinical Decision Support on Cardiovascular Risk Among Adults With Bipolar Disorder, Schizoaffective Disorder, or Schizophrenia. *JAMA Netw Open*. Published March 07, 2022. doi:10.1001/jamanetworkopen.2022.0202

### Data

**Data available:** No

### Additional Information

**Explanation for why data not available:** Individual-level data are not available for data sharing. Sharing of summary data will be considered on request.
